# Supplementary material for: Last interglacial (MIS 5e) sea-level proxies in southeastern SouthAmerica
Source: Copernicus journal article supplement (doi:10.5194/essd-2020-247), 2020-09-10
Supplement: Supplementary file [file essd-2020-247-RC1-supplement.pdf]

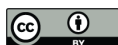

# Last interglacial (MIS 5e) sea-level proxies in southeastern South America

Evan J. Gowan<sup>1,2</sup>, Alessio Rovere<sup>2</sup>, Deirdre D. Ryan<sup>2</sup>, Sebastian Richiano<sup>3</sup>, Alejandro Montes<sup>4</sup>, Marta Pappalardo<sup>5</sup>, and Marina L. Aguirre<sup>6,7</sup>

<sup>1</sup>Alfred Wegener Institute, Helmholtz Center for Polar and Marine Research, Bremerhaven, Germany

<sup>2</sup>MARUM, University of Bremen, Bremen, Germany

<sup>3</sup>Instituto Patagónico de Geología y Paleontología, IGP-CENPAT-CONICET. Puerto Madryn, Argentina

<sup>4</sup>Universidad Nacional de Tierra del Fuego, Ushuaia, Argentina

<sup>5</sup>University of Pisa, Pisa, Italy

<sup>6</sup>CONICET, Consejo Nacional de Investigaciones Científicas y Técnicas, Argentina

<sup>7</sup>Facultad de Ciencias Naturales y Museo (FCNyM), Universidad Nacional de La Plata (UNLP), 1900 La Plata, Argentina

**Correspondence:** Evan J. Gowan (evan.gowan@awi.de and evangowan@gmail.com)

## Abstract.

Coastal southeast South America is one of the classic locations where there are robust, spatially extensive records of past high sea level. Sea-level proxies interpreted as being Last Interglacial (Marine Isotope Stage - MIS 5e) exist along the length of the Uruguayan and Argentinian coast, with exceptional preservation especially in Patagonia. Many coastal deposits are correlated to MIS 5e solely because they form the next highest terrace level above the Holocene highstand; however, dating control exists for some landforms from amino acid racemization, U/Th (on molluscs), electron spin resonance (ESR), and optically stimulated luminescence (OSL) dating. As part of the World Atlas of Last Interglacial Shorelines (WALIS) database, we have documented a total of 60 MIS 5 proxies attributed with various degrees of precision to MIS 5e. Among these, 48 are sea-level indicators, and 11 are marine limiting indicators (sea level above the elevation of the indicator), and 1 is terrestrial limiting (sea level below the elevation of the indicator). Limitations on the precision and accuracy of chronological controls and elevation measurements means that most of these indicators are considered to be low quality. The database is available at <https://doi.org/10.5281/zenodo.3991597> (Gowan et al., 2020).

## 1 Database and literature overview

- During Marine Isotope Stage (MIS) 5e (about 130–115 ka), global sea level was higher than present by 5–9 m (Dutton and Lambeck, 2012). MIS 5e represents one substage within the MIS 5 interglacial (about 130–71 ka), which includes two additional substages, MIS 5c and MIS 5a (Fig. 1). These latter substages are characterized by lower sea-level peaks (−24 to +1 m and −22 to +1 m, respectively) than MIS 5e (Creveling et al., 2017). In order to infer the geometry of ice sheets during MIS

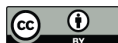

5, a global compilation called the the World Atlas of Last Interglacial Shorelines (WALIS) database (<https://warmcoasts.eu/world-atlas.html>) has been created to document MIS 5e sea level indicators and proxies following a standardized data template. Our database is available open-access at this link: <https://doi.org/10.5281/zenodo.3991597> (Gowan et al., 2020), and description of each database field can be found here: <https://doi.org/10.5281/zenodo.3961543> (Rovere et al., 2020). Our database of southeastern South American paleo-sea level proxies incorporates geologically constrained features with sufficient elevation and geological context to infer past sea level position. The literature survey covers Uruguay, Argentina, and the eastern portion of Tierra Del Fuego in Chile. Published proxies exist along the entire coast (fig. 2).

Due to ambiguity in the age constraints, many of the features in this paper are assigned to MIS 5, rather than specifically to MIS 5e. However, due to the differences in sea-level height between the successive substages of MIS 5, in the absence of evidence for tectonic effects, specifically uplift, we infer that any sea-level record that has been attributed to MIS 5, corresponds to MIS 5e. Similar to other studies where there are multiple highstand records for MIS 5 present (Lambeck and Chappell, 2001; Potter et al., 2004; Dumas et al., 2006; Surić et al., 2009; Moseley et al., 2013), MIS 5e features are expected to be those at the highest elevation.

Patagonian Argentina was one of the first places in the world where multiple distinct indicators of past sea level highstands were observed (Darwin, 1846). Due to the climatic conditions and minimal erosion, there is exceptional preservation of beach ridges and other relic Quaternary and Pliocene deposits along the entire coast, and they show remarkable continuity. North of Patagonia, in the Buenos Aires Province, Pleistocene marine and estuary sediments have also been found (*e.g.* Aguirre and Whatley, 1995). For the WALIS database, we have only included sea level indicators with sufficient depositional context to confidently assign an indicative range (aside from estuary deposits, which are here considered as marine limiting data points), sufficient elevation information to infer the paleo sea level, and chronological control that provides some confidence that the indicator is MIS 5 in age. The indicative range is the elevation range, relative to a fixed water level (*i.e.* mean sea level) that a landform, deposit or biological material will be found (Shennan, 2015).

Geological indicators of multiple past sea level highstands in Argentina (specifically Patagonia) were first measured and described in detail by Darwin (1846) on the Voyage of the Beagle. Darwin presented six cross-sections of marine terraces, though only three of them had levels that are potentially last interglacial in age (most are reported at much higher elevations). Darwin remarked on how the elevation of different terraces seemed to be nearly the same along the entire Patagonian coast, and concluded that their formation was likely the result of land being uplifted. This hypothesis continues to be favoured by many researchers working on Argentinian sea level (*e.g.* Pedoja et al., 2011; Isla and Angulo, 2016).

The commonly used nomenclature of Patagonian terrace levels was proposed by Feruglio (1950). In total, Feruglio (1950) identified and correlated six distinct terraces (I to VI, Table 1) on the basis of terrace elevation and fossil mollusc assemblage. Subsequent studies correlated Terrace V to MIS 5 (Codignotto et al., 1988; Rutter et al., 1989, 1990; Rostami et al., 2000). Feruglio's terrace nomenclature and correlations have continued to be used by subsequent authors. The next major set of studies on past Patagonian sea level was done by Codignotto and colleagues (Bayarsky and Codignotto, 1982; Codignotto, 1983, 1984, 1987), which was summarized by Codignotto et al. (1988). Many of these terraces were dated using radiocarbon

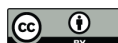

measurements. Pre-Holocene terraces that returned finite dates were regarded by Codignotto et al. (1988) as belonging to the late Pleistocene.

55 From the late 1980s onwards, a number of studies presented chronological constraints allowing for a more confident MIS 5 assignment. Techniques used to date MIS 5 shorelines in Argentina include amino acid racemization (Rutter et al., 1989, 1990; Aguirre et al., 1995; Schellmann, 1998), electron spin resonance (Radtke, 1989; Rutter et al., 1990; Schellmann, 1998; Schellmann and Radtke, 2000) and U/Th on mollusc shells (Radtke, 1989; Schellmann, 1998; Isla et al., 2000; Rostami et al., 2000; Bujalesky et al., 2001; Pappalardo et al., 2015). These studies provide the bulk of the confidently assigned MIS 5 sea  
 60 level proxies in the database.

The most recent review of past sea level in Argentinian Patagonia was by Pedoja et al. (2011). They split the coast into seven zones, and measured elevations of changes in slope in the topography, which they interpreted as past sea level highstands (shoreline angles). They reported up to nine slope angles in these zones. Their interpreted MIS 5 shoreline (named T1) indicates that there is spatial variability in the elevation.

## 65 2 Sea level indicators

The descriptions of types of sea-level proxies found in Argentina are found on Table 2. The sea level indicators include beach deposits (*e.g.* fig. 3), beach ridges (*e.g.* fig. 4), paleo-lagoonal deposits and marine terraces. In addition, there are marine limiting estuary deposits.

For most of the data presented in this database, no indicative meaning or modern analogue was provided in the original  
 70 studies. As a result, we use the IMCalc tool (Lorscheid and Rovere, 2019) to calculate the indicative range. IMCalc uses the definitions from Table 2 plus global wave and tidal models to estimate the indicative range at the location of the sample.

At multiple locations in northern Argentina, two Pleistocene or older estuary deposits are identified (Fig. 7). One is highly cemented and has not been analyzed by any numerical geochronological method. The second unit, overlying the highly cemented deposit, has returned finite radiocarbon dates. The interpretation of these radiocarbon dates is elaborated on in Section 4. The  
 75 estuary deposits are regarded as minimum limiting indicators, as there is no limit to the depth at which they can be found (Perillo, 1995). The maximum limit is the highest astronomical tide, so it is necessary to apply the difference between the high tide level and median level to the elevation uncertainty.

In cases where elevations are reported as being relative to high tide, we provide a correction to make the reference to mean sea level. The tide statistics are taken from the Servicio de Hidrografía Naval website ([http://www.hidro.gov.ar/oceanografia/Tmareas/Form\\_Tmareas.asp](http://www.hidro.gov.ar/oceanografia/Tmareas/Form_Tmareas.asp)). The tide tables only report the predicted astronomical component of the tide, and does not take  
 80 into account meteorological or steric components (Pappalardo et al., 2019). This will introduce an uncertainty of unknown magnitude to all data referenced to tidal datums from this sources (see Section 3).

One of the challenges when making this database is that stratigraphic descriptions and interpretations of depositional environment are not stated. The beach ridge deposits of Patagonia are typically composed of gravel (Tamura, 2012) and deposition  
 85 via wave-action is certain. The beach ridges in Patagonia are typically interpreted as raised storm berms. The presence of

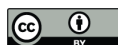

marine shell within terrace beds allows for the inference that they are marine in origin. However, the lack of descriptions has prompted the assignment of low quality scores some of these indicators. Studies with detailed stratigraphic context and, as a consequence, relatively high quality scores can be found in Schellmann (1998) and Rabassa et al. (2008). A summary of the indicators, along with quality assessment, is shown on Table 3.

### 90 3 Elevation measurements

Most of the reviewed studies report elevations measured by barometric altimeter, or do not report an elevation measurement method (Table 4). Rostami et al. (2000) state that there is a strong suspicion that elevation in some studies may have just taken the value from Feruglio (1950) (which was likely derived from topography maps and Jacob's staff measurements), rather than being directly measured. Pappalardo et al. (2019) did a further review of the vertical uncertainties of Argentinian sea level indicators, and stated that problems with mis-identification of sea level indicators and poor quality elevation measurements hamper accurate assessments of paleo-sea level. They also state that even within the same region, several studies had disagreements on what paleo-sea level was during MIS 5, due to methodological differences in measuring elevation. The elevation measurement for previous studies were often made at the elevation of the shell samples that were used for dating, rather than measuring the thickness of the geological unit that would provide a more robust estimate of the true paleo-sea level range. As an example (Table 1 in Pappalardo et al. (2019)), at Camarones, estimates of MIS 5 sea level ranged between 7.5 and 17 m in different studies.

Due to the ambiguity of elevation measurements, a high degree of uncertainty is assigned to many sea-level indicators. An additional 20% uncertainty was added to altimetric measurements since this method is less reliable than levelling or differential GPS, and results can vary depending on atmospheric conditions. This added uncertainty is further justified as most altimetric measurements lack details on how they were referenced to sea level. An additional source of uncertainty is when a section is described, but it is not clear if the reported elevation refers to the top or the bottom of the section. In these instances, the entire thickness of the section is added to the error. When the details of where on the outcrop or landform the elevation was measured is not stated, the elevation error is assigned to be 20% of the reported elevation from the highest reported elevation. All elevations were either reported in reference to mean sea level (often referenced to a local tide gauge) or, for studies in which no sea-level datum is defined, the measurements were assumed to be referenced to mean sea level for entry into WALIS. This definition may have complications as the local "mean" sea level can have an offset from the global mean sea level (or orthometric elevation) (Lanfredi et al., 1998; Pappalardo et al., 2019), which has not been accounted for in our entries. Sites that were reported from a high tide datum have been corrected to mean sea level using the values from nearby tidal charts (see Section 2).

In some locations, it is possible that the same outcrop is described by multiple studies. However, since the precise locations of these deposits are not always clear, each record is included as a separate indicator, with individual elevation uncertainties. Indicators for which it was not possible to determine an exact location are included in the database, since they may have some utility in future modelling studies, but given the lowest quality score (zero).



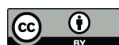

## 4 Dating techniques

MIS 5 deposits have been dated using amino acid racemization values (AAR), electron spin resonance (ESR), uranium-thorium dating (U/Th), optically stimulated luminescence (OSL) and radiocarbon methods. The excellent preservation of marine shell fossils (fig. 5), often still articulated, allow for the application of AAR, ESR and U/Th techniques to provide a confident MIS 5 age assignment. These methods ~~have~~ can be used to distinguish shell of MIS 5 from earlier interglacials or the Holocene, but lack the resolution to differentiate between substages of MIS 5; *i.e.* 5e, 5c, or 5a. A wide variety of bivalve and gastropod species have been used for dating, which is listed on Table 5. Radiocarbon and, to some extent, OSL dates have been used to establish minimum ages, proving that a deposit is older than the Holocene. Other absolute dating techniques, environmental context from fauna, and stratigraphic position, can be used to support an MIS 5 age assignment. In this compilation, any site where minimum ages are the only chronological control, we give a low quality assignment (*i.e.* zero out of five). We did not include features that have no dating applied to them in WALIS, though for some locations we have noted them in the text.

### 4.1 Amino Acid Racemization (AAR)

The analytical procedure for AAR is reported by Rutter et al. (1989). They reported aspartic acid and leucine values of multiple species of shells, without analytical uncertainties. They did not report numerical ages, only using the values to distinguish between deposits of different age. Aguirre et al. (1995) reported numerical ages from AAR, calibrated with Holocene shells of the same species. However, due to the non-linear kinematics of racemization, this approach is not recommended in Pleistocene shell (Clarke and Murray-Wallace, 2006). In order to do correlations, the same species should be used, since the racemization is species dependent. This is not possible in many of the locations where AAR samples have been reported in our study area.

### 4.2 Electron Spin Resonance (ESR)

The details of ESR dating can be found in Rutter et al. (1990) and Schellmann and Radtke (1997). The main issue with ESR is that mollusc shells are not a closed system to uranium, so therefore it cannot be assumed that the uranium concentration was constant since deposition. As a result of this problem, Schellmann and Radtke (1997) recommended using the “early uptake” model for determining the age. Under this hypothesis, most of the uranium was taken up in the shell within the first 10 000 years of deposition. Although this approach will give younger ages than the commonly used “linear uptake” model, Schellmann and Radtke (1997) regarded it as being more accurate. All of the ages in this database use the early uptake model. The early ESR dates (Radtke, 1989; Rutter et al., 1990) are not reported with an uncertainty, so we use a value of 15% of the age, as recommended in those studies.

### 4.3 U/Th dating

The U/Th dating done by Radtke (1989) was accomplished using mass spectrometry. The measurements were done at three laboratories, University of Cologne, University of Heidelberg and McMaster University. The University of Cologne laboratory corrected for excess thorium using the formula  $-(^{232}\text{Th} \times (3\text{ppm U}/12\text{ppm Th}) \times 0.378)$  if the thorium was in excess of 0.3

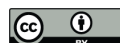

150 ppm. This corrected value was preferred by Radtke (1989). Rostami et al. (2000) reported U/Th analysis on shells using alpha spectrometry. The ages were generally consistent with ESR dates from the same deposits. Pappalardo et al. (2015) also used this method for dating shells, using mass spectrometry and also returned dates that were consistent with ESR dating.

#### 4.4 Optically stimulated luminescence (OSL)

OSL ages were derived from quartz grains of samples collected at two sites in Uruguay (Rojas and Martínez, 2016), and three  
155 sites in Argentina (Martínez et al., 2016; Zárate et al., 2009; Beilinson et al., 2019). Analysis for the Uruguay samples and the site at Ezeiza, Argentina, was completed at the University of Illinois at Chicago (Rojas and Martínez, 2016; Martínez et al., 2016). The samples were collected using a PVC pipe with only the inner part of the sample was retained for analysis. The OSL sample at Nicolás Vignogna III Quarry was analyzed at Data Pçao Labs ~~Beilinson et al. (2019)~~. The samples were collected using metal tubes and black opaque bags. The samples from Hudson, Argentina, were collected from blocks of  
160 sediment extracted from the outcrop (Zárate et al., 2009).

#### 4.5 Radiocarbon

During the 1980s and 1990s, a lot of debate centered on the age of the Pleistocene shorelines, as conventional radiocarbon dating provided finite dates. González et al. (1988b) detailed the method of radiocarbon dating as applied to Pleistocene deposits. Despite careful pretreatment of the shells from deposits suspected to be MIS 5 in age, the conventional radiocarbon  
165 method returned finite ages for pre-Holocene shells. The result of these finite dates led some authors to suggest the possibility of a MIS 3 sea level highstand record along the Argentinian coast (Codignotto et al., 1988; González et al., 1988b; González, 1992; Aguirre and Whatley, 1995). González and Guida (1990) supported this interpretation through the use of magnetostratigraphy, and correlating reverse magnetized stratigraphic units to magnetic excursions (see Section 4.6). Cionchi (1987) and Radtke (1988) rejected the interpretation of the finite ages as reliable, and suggested that they were contaminated with secondary  
170 carbonates. With the introduction of other dating techniques applied to Argentinian coastal deposits, the assignment of an MIS 3 age became untenable (Rutter et al., 1989, 1990, 1992; Aguirre et al., 1995). Rojas and Martínez (2016) concluded that MIS 3 aged shells found in Uruguay Pleistocene deposits were minimum ages, since the shell species were consistent with warmer than present water temperatures, something that was unlikely to be true during the MIS 3 period.

Radiocarbon dating of suspected Late Pleistocene material like shells requires careful pretreatment to remove secondary  
175 precipitates and other contaminants (Wood, 2015). Techniques to produce reliable dates are reliant on accelerator mass spectrometry (AMS) radiocarbon measurements, so the conventional radiocarbon ages previously acquired in South American deposits should be regarded, in absence of further constraints, as minimum ages. However, we suggest that minimum ages can still be used to distinguish between Holocene and Pleistocene deposits, the latter characterized by minimum radiocarbon ages. This is confirmed by the fact that, in some places, Pleistocene deposits have been dated by both radiocarbon and other  
180 techniques **Rutter et al. (1989, 1990); Aguirre et al. (1995)**. Marine deposits with minimum radiocarbon ages and at an adjacent elevation above the Holocene highstand position have been assigned to MIS 5 within WALIS. These data should be treated with caution, and regarded as being extremely poor quality.



## 4.6 Paleomagnetism

González and Guida (1990) reported paleomagnetic measurements as a way to distinguish between different aged Pleistocene shoreline deposits. In their paper, they reported reverse magnetized sediments, which they assigned MIS 3 and MIS 5 ages on the basis of correlation to magnetic excursions (*i.e.* geologically brief periods of weak or reversed magnetic field). They regarded definitively reversed sediments to be correlative to the Blake Excursion. The Blake Excursion happened during MIS 5d, between 112-116 ka (Rossi et al., 2014). Since the MIS 5 highstand more likely happened during MIS 5e, and MIS 5d sea level was tens of meters below present sea level (Lambeck and Chappell, 2001), either the magnetic measurements are in error or the deposit is not MIS 5 in age. González and Guida (1990) interpreted some deposits with anomalous magnetism that also had finite radiocarbon ages as being correlative to the Lake Mungo excursion. The Lake Mungo excursion was reported to have happened about 30 ka, but recently it has been discredited (Roberts, 2008). We put no confidence in the ability of these measurements to assign an age to the deposits and do not use them to assign a MIS 5 age.

## 4.7 Stratigraphy

South American geologists who have worked on paleo-sea level have tended to use the glacial-interglacial chronostratigraphic nomenclature that is used in North America. The Wisconsin Glaciation represents the most recent glacial period, covering MIS 5d-2 (Otvoš, 2015). The Sangamon interglacial represents the last interglacial, broadly defined as the period when there were dominantly non-glacial conditions in the Americas. Some definitions place the Sangamonian to encompass all of MIS 5, but more recent definitions narrow it to only MIS 5e (Otvoš, 2015). It is therefore roughly equivalent to the European Eemian Stage, which strictly correlates with MIS 5e (Mangerud et al., 1979). In Buenos Aires Province, the marine transgression correlated to MIS 5 is called Belgranense Stage (Isla et al., 2000). At only one location identified in this review, Isla Navarino, Chile, is the age of the sea-level indicator constrained on the basis of its stratigraphic position below Wisconsin aged glacial sediments.

## 5 Relative Sea Level indicators

In total, we reviewed 60 documented possible MIS 5 sea level proxies, of which 48 are sea-level indicators, 11 are marine limiting points, and 1 is terrestrial limiting. A plot of the elevation of these proxies is presented in fig. 10. Sea-level indicators have enough information to tie the feature to sea level, while marine limiting and terrestrial limiting only have enough information to place the feature below or above sea level, respectively. The paleo-sea level is calculated using the indicative range of the indicator, the reported elevation and thickness of the indicator, and the uncertainties applied to those measurements. The elevation of sea level indicators along the coast ranges between 0 and 30 m above mean sea level (amsl). This large range reflects the uncertainty on elevation measurements; however, it could also reflect incorrect correlation to MIS 5e. There is also the possibility that the elevation variability is a real feature related to glacial-isostatic processes (see Section 6.4.2). The locations in this section are described in order of north to south along the South American coast.



## 5.1 Uruguay

215 Uruguay has data at three locations (Fig. 6).

### 5.1.1 La Coronilla

Martínez et al. (2001) and Rojas and Martínez (2016) describe a 0.6 m thick marine deposit with abundant marine mollusc fossils located at the modern coast. They interpreted the deposit to represent a low energy environment, such as a bay. The age of the deposit is only constrained with minimum age radiocarbon dates. A taxonomic analysis by Rojas Buffet et al. (2018) identified many species that are currently found 600 km north of La Coronilla, indicating warmer than present water conditions, which they interpreted as supporting a MIS 5e age assignment. The marine limiting elevation is  $0.50 \pm 0.53$  m.

### 5.1.2 Zagarzazú

Rojas and Martínez (2016) described a thin (0.5 m) exposure of marine sediments at the modern coast containing shells in living position. OSL dating of this unit supports a MIS 5 age assignment. The marine limiting elevation is  $0.50 \pm 0.53$  m.

### 225 5.1.3 Puerto de Nueva Palmira

Marine deposits, interpreted as having been deposited in a proximal, wave dominated environment, at Puerto de Nueva Palmira were described by Martínez et al. (2001) and Rojas and Martínez (2016). The deposit contained disarticulated, randomly oriented shell fossils. Martínez et al. (2001) collected two minimum age radiocarbon dates from this deposit, but interpreted the deposit as being from the last interglacial on the basis that the marine fauna indicate a warmer than present environment. Rojas and Martínez (2016) reported an OSL date of  $80.7 \pm 5.5$  ka, which suggests an MIS 5a assignment, but they were cautious on assigning a specific substage of MIS 5 for the deposit. This deposit gives a marine limiting elevation of  $12.5 \pm 2.8$  m.

## 5.2 Northern Argentina: Entre Ríos and Buenos Aires Province

Entre Ríos Province and Buenos Aires Province have data at 14 locations (Fig. 7).

### 5.2.1 Southeast Entre Ríos Province

235 González et al. (1986, 1988b) and González and Guida (1990) describe a Pleistocene estuary deposit in a location called Irazusta Quarry. The exact location is estimated based on a map from the paper, but is likely over 100 km from the modern coast. The deposit was about 1.2 m thick, and contained shells that indicate a brackish environment, overlying a relic shore platform. They collected three finite radiocarbon dates, but these are regarded as minimum ages. The minimum sea level from this deposit is  $6.2 \pm 1.5$  m. We applied an uncertainty from the modern tidal range using the nearest tide gauge, on Martín García Island. Based on the similarity in elevation of this deposit to the Magdalena site (see Section 5.2.7), we infer it is MIS 5 in age.

González et al. (1988b) and González and Guida (1990) completed magnetostratigraphic analysis of the substrate upon which the platform surface was formed, a lagoon deposit. The reverse polarity of the sediments prompted correlation of the



lagoon deposit with the Blake Excursion, a minor reversal during MIS 5d. However, due to the implications for the necessary uplift to place MIS 5d sediments above modern sea level (see Section 4.6), this correlation is considered to be incorrect.

## 245 5.2.2 Martín García Island

González and Ravizza (1987) and González et al. (1986) describe a thin (0.4 m) Pleistocene estuary deposit adjacent to a paleo-cliff on Martín García Island. Based on finite radiocarbon ages, they assigned a MIS 3 age, we regard these as minimum ages. Based on similar elevation and stratigraphy as the Magdalena site (Section 5.2.7) we regard this deposit to be MIS 5 in age. The marine limiting elevation from this deposit is  $7.5 \pm 1.7$  m.

## 250 5.2.3 Pilar

Fucks et al. (2005) describe a Pleistocene aged estuary deposit, with a maximum elevation of 8 m. A radiocarbon dated shell returned a infinite age. If this deposit is MIS 5 in age, it has a marine limiting elevation of  $8 \pm 1.8$  m. Based on the similarity in elevation to the Magdalena site (Section 5.2.7), we regard this as a MIS 5 deposit.

## 5.2.4 Ezeiza

255 Martínez et al. (2016) investigated mollusc fauna from marine sediments exposed by at a river bank in Ezeiza. Two radiocarbon dates from the deposit gave minimum limiting dates. The species found in the sediment indicate warmer than present water conditions, which led them to conclude the sediment corresponds to MIS 5. The marine limiting elevation is  $3.5 \pm 0.8$  m.

## 5.2.5 Nicolás Vignogna III Quarry

260 Beilinson et al. (2019) described a sedimentary sequence in a quarry southwest of Buenos Aires. There were three facies they interpreted as being associated with MIS 5. The lowest facies was interpreted as a salt marsh, the second facies was deposited in a coastal creek environment, and the upper facies is composed of beach-like deposits associated with storm surges. In the present day, storm surges that form these kind of deposits reach between 1 and 4.4 m above present sea level. The environmental conditions derived from fossils in the deposit indicate a range of conditions, from freshwater to marine, so we interpret this as being terrestrial limiting (*i.e.* forming above mean sea level, but influenced by sea water at least periodically). Gasparini et al. (2016) reported a radiocarbon date from the beach-like deposit, and due to the sedimentary environment, considered it to be terrestrial limiting. An OSL date from the beach-like deposit gave an age of 60 ka (Beilinson et al., 2019), which also underestimates the true age. If this deposit formed during MIS 5, it gives a terrestrial limiting elevation of  $1.3 \pm 3.1$  m.

## 5.2.6 Hudson

270 Zárate et al. (2009) described a section located at Hudson. Within the section was a laterally discontinuous marine clayey silt, interpreted as being deposited in a distal tidal channel, with marine fossils. OSL dating of this unit is consistent with an MIS 5 age assignment. The marine limiting elevation is  $6.1 \pm 1.9$  m.



### 5.2.7 Magdalena

Weiler et al. (1988) and González et al. (1986) describe a thin (0.2 m) estuary deposit beneath a paleo-cliff deposit at Cañada de Arregui, near Magdalena. Radiocarbon ages from this deposit gave minimum ages (Aguirre et al., 1995). Aguirre and Whatley (1995) and Aguirre et al. (1995) collected *Tagelus* sp. mollusc shells for AAR analysis from the same outcrop. The AAR values for the outcrop were higher than Holocene samples from the same location. Using the Holocene data for calibration, a numerical age of 106 ka was determined, which is consistent with a MIS 5 age. The minimum sea level from this deposit is  $6.0 \pm 1.7$  m. Although this site has relatively good age control, the lack of information on elevation measurements means that it is relatively low quality.

### 5.2.8 Puente de Pascua

Aguirre and Whatley (1995) and Aguirre et al. (1995) collected *Tagelus* mollusc shell samples for AAR dating from a well cemented coquina at Puente de Pascua. An AAR date of 123 ka is consistent with a MIS 5 deposit. However, insufficient information is given to ascertain an indicative meaning, so we assign this data point as marine limiting, with an elevation of  $3.5 \pm 1.3$  m.

Fucks et al. (2006, 2010) returned to this location and did a further investigation of the MIS 5 deposit. They reported a 0.7 m thick sand deposit with lenses of shells that they interpreted to be a beach deposit. The reported elevation of the deposit (6-8 m) is higher than reported by Aguirre and Whatley (1995) and Aguirre et al. (1995) (3-4 m). The calculated sea level from this deposit is  $6.8 \pm 4.0$  m.

### 5.2.9 Mar Del Plata

González et al. (1986) gave a brief description of a transgressive beach deposit. Radiocarbon dating provided minimum ages. A magnetostratigraphic analysis of this deposit showed that it has negative magnetic polarity. González and Guida (1990) interpreted this to be correlative to the Lake Mungo magnetic excursion, which they correlated to MIS 3 on the basis of the radiocarbon dates (which they regarded as reliable). We have included this point as a MIS 5 deposit based on elevation. If the magnetic measurements are reliable, this would indicate that an MIS 5e age assignment is unlikely, though. The calculated sea level from this deposit is  $10.3 \pm 2.5$  m.

### 5.2.10 Claromecó

Isla et al. (2000) and Isla and Angulo (2016) reported on a beach deposit that was correlated to MIS 5 using a U/Th date. The calculated sea level from this deposit is  $7.0 \pm 2.0$  m.

### 5.2.11 Bahía Blanca

González et al. (1986, 1988b) described an estuary deposit, overlying a cemented delta deposit. The estuary deposit contained many mollusc fossils that had minimum radiocarbon ages. The minimum sea level from this deposit is  $13.5 \pm 3.6$  m. The



relatively high elevation of this deposit and the Holocene highstand deposits ( $>10$  m amsl) led González et al. (1988b) to hypothesize that this location is uplifting. Aliotta et al. (2001) investigated these deposits and concluded that the depositional environment during the Pleistocene was lower energy than during the Holocene highstand.

### 305 5.2.12 Colorado River Delta

González et al. (1986, 1988b) briefly described a beach ridge deposit with fossil mollusc shells that had minimum radiocarbon ages. The calculated sea level from this deposit is  $4.8 \pm 1.8$  m. Fucks et al. (2012a) also mapped Pleistocene marine deposits that they correlated to MIS 5 in the Colorado River region, but there is not enough information for an assessment of paleo-sea level.

### 310 5.2.13 Bahía Anegada

Weiler (1993) described several individual pre-Holocene beach ridge deposits in Bahía Anegada. These deposits had minimum radiocarbon ages. Unfortunately, elevation measurements are not available and this location was not added to the database.

Fucks et al. (2012a) revisited the sites, and reported elevations of 8–10 m, which was possibly based off values from topographic maps or Google Earth. They correlated them to MIS 5 on the basis of similar elevation to other dated landforms in the region. However, there is not a sufficient description of the deposits, nor dating, to include in our database.

### 5.2.14 San Blas

Trebino (1987) described the geomorphology and raised shorelines in the San Blas area. They described two groups of shorelines, one that was Holocene in age, and other that was determined to be Pleistocene on the basis of finite radiocarbon dates. The Pleistocene group, at a higher elevation, consists of three beach ridges with elevations of 9–10 m. We correlate the shorelines to MIS 5, with low confidence. They reported that the modern elevation range for coastal dune and beach deposits is between 0.5 and 7 m, which we take as the modern analogue. We calculate a paleo-sea level of  $5.8 \pm 3.8$  m from these shorelines.

Rutter et al. (1989) collected fossil mollusc shells at two sites in San Blas, both of which were interpreted as being Pleistocene in age on the basis of AAR values. The samples were taken from a 1.2 m thick beach deposit (SB-2) and a 6 m thick beach gravel layer within a 10 m high section (SB-1). When comparing the same species, the AAR values were generally lower for the samples taken at SB-2 than at SB-1, which implies the SB-1 site represents an older deposit. Rutter et al. (1989) defined the SB-2 deposit as an “intermediate” aged deposit, older than Holocene, and cautiously assigned a MIS 5 age. The calculated sea level of SB-2  $12.4 \pm 3.1$  m. ESR dating of mollusc shells from the deposit at SB-1 returned ages that were consistent with an MIS 5 age (Rutter et al., 1990), which contradicts their earlier interpretation that the deposit is significantly older. If accepted as being MIS 5, the calculated sea level is  $4.0 \pm 3.9$  m. Fucks et al. (2012a) also investigated this location and reported on mollusc species.





### 5.3 Patagonia: Rio Negro Province

Rio Negro Province has data at one location (Fig. 8).

#### 5.3.1 San Antonio Oeste

Rutter et al. (1989, 1990) and Radtke (1989) collected mollusc samples at eight locations with beach ridges and beach deposits in the San Antonio Oeste area. Four of these locations, described below, with stated elevations between 8-12 m, were assigned a MIS 5 age on the basis of AAR values and ESR dates. Fucks et al. (2012b) also visited these sites and provided further descriptions of the geomorphology and mollusc fossils of these deposits.

A section near Baliza San Matías (Faro San Matías in Radtke (1989)), containing a beach deposit Radtke (1989); Rutter et al. (1989, 1990). The elevation of the section is inconsistent between the studies. Rutter et al. (1989, 1990) described the section that at 11 m amsl (without description of what the elevation is refers to), with the beach gravel deposit beneath 1.5 m of loess. The sketch in these papers indicates that the section thickness is 4.4 m, with the sample taken about 2 m below the top of the section. Radtke (1989) described the section as approximately 0.9 m thick, with the top of the beach gravel layer being at about 10 m amsl, although it should be referring to the same section as Rutter et al. (1989, 1990). We have taken the elevation from Rutter et al. (1989, 1990), which has a much broader elevation range, and will encompass the range stated in Radtke (1989). Calculated paleo-sea level from this location is  $9.0 \pm 5.5$  m.

Another site, at Puerto de Vialidad, comprised a 8 m section of beach gravels, described as being at the same elevation as Baliza San Matías and it is unclear whether the elevation refers to the top or bottom of the deposit. The calculated sea level for this location is  $9.7 \pm 8.5$  m.

A site at La Rinconada there is a 0.5 m section containing beach gravels, which overlies a shore platform. As with the site at Baliza San Matías, there is a discrepancy between the description in Radtke (1989) and in Rutter et al. (1989, 1990). Radtke (1989) states the elevation is about  $8 \pm 2$  m (originally referenced to high tide, corrected assuming the high tide is 5 m). Rutter et al. (1989, 1990) report the elevation as 8-12 m. We use the elevation reported by Rutter et al. (1989, 1990) to be consistent with the other sites at San Antonio Oeste. The sea level from the beach deposit is  $8.7 \pm 3.9$  m, while the shore platform is  $8.0 \pm 4.8$  m.

A site called "Tankstelle" (a gas station) northwest of San Antonio Oeste has beach ridges that were dated with ESR and U/Th methods (Radtke, 1989). The reported elevation of the beach ridges was 8-12 m in Rutter et al. (1990), while the description in Radtke (1989) merely states "about 12 m". As with the other locations, we use the description from Rutter et al. (1990). The calculated sea level from this location is  $6.3 \pm 2.8$  m.

### 5.4 Patagonia: Chubut Province

Chubut Province has data at five locations (Fig. 8).



#### 5.4.1 Puerto Lobos

Bayarsky and Codignotto (1982) investigated six raised shoreline deposits in Puerto Lobos. Mollusc shells from two of the deposits, consisting of beach gravel, had minimum radiocarbon ages. Due to their similar elevation to better constrained sea level indicators in the region, we tentatively correlate these deposits to MIS 5. The calculated sea level of the beach deposits are  $8.8 \pm 2.9$  m and  $6.8 \pm 2.7$  m. Boretto et al. (2013) provided additional information on the mollusc fossils from these deposits.

#### 5.4.2 Caleta Valdés

Codignotto (1983) surveyed the surface of a marine terrace in northern Peninsula Valdes, with an elevation of  $20 \pm 5$  m, measured by barometric altimeter. Marine mollusc shells, in living position, returned finite radiocarbon ages. However, the terrace is considered to be of MIS 5 or older on the basis of elevation. The location of the surveyed landform is only described generally. The sea level from this indicator is  $19.1 \pm 7.5$  m.

Rutter et al. (1989) collected samples of marine mollusc shells for AAR analysis at four of five beach ridges identified at Caleta Valdes. They concluded, based on the relative differences in AAR values of nine shell species (Table 5), that the second lowest set of ridges with a peak elevation of about 27 m, is MIS 5 in age. The elevation range of the beach ridges is estimated from a diagram in the paper, and falls between 20 and 27 m, indicating a sea level of  $20.7 \pm 4.4$  m. ESR dating of mollusc shells from this beach ridge confirmed this assignment (Radtke, 1989; Rutter et al., 1990).

Schellmann (1998) reported dates from a lagoon deposit located between the beach ridges attributed to MIS 5 by Rutter et al. (1989, 1990) and another beach ridge that returned an ESR date that was older than 279 ka. The ESR dates from this deposit are consistent with MIS 5 (109-136 ka), but they suspected the age was underestimated because the current water saturation conditions are less than what was likely normal for the sediments. They therefore assigned a MIS 7 age. No modern analogue for the lagoon was given in the original study, so we took it to be -1.5 m below the lowest low tide value, as this is the maximum depth of modern lagoons worldwide (Rovere et al., 2016). If it is a MIS 5 deposit, then the calculated sea level is  $9.2 \pm 3.3$  m.

Rostami et al. (2000) collected mollusc shell samples from two marine terraces. At both sites, they reported the elevation of the top of the terrace, and collected the samples at 1.2 m depth of burial from the top of the terrace. The lower, seaward terrace has a calculated sea level of  $15.6 \pm 4.0$  m, while the higher, landward one is  $16.6 \pm 4.2$  m. Further details on the morphology of the terrace were not presented.

#### 5.4.3 Cabo Raso

Codignotto (1987) described marine deposits located at 20-22 m at Cabo Raso, with minimum radiocarbon ages. However there is not enough detail to infer a sea level indicator from their description. Ribolini et al. (2011) reported a beach ridge at Cabo Raso at 15-16 m elevation, which was assigned a Pleistocene age on the basis of elevation and faunal content. However, no dating of this landform was performed, so it also was not included in our database.



#### 5.4.4 Camarones

Codignotto (1983) surveyed and described possible MIS 5 elevated terraces and beach deposits in the Camarones area. The exact location of these sites is uncertain, but they describe a 15 km section of coastline near the town. The first site is a beach deposit located north of Camarones. The elevation was taken from Feruglio (1950) and was likely not measured during their  
 395 survey. The elevation of the deposit was reported as 17–22 m. Shell samples, retrieved from living position, returned minimum radiocarbon ages. Based on elevation, it is possible that it is a MIS 5 deposit. The sea level calculated from this deposit is  $19.0 \pm 5.4$  m. The second site south of Camarones is a marine terrace measured with an altimeter to an elevation between 15–22 m. They did not state what the elevation was referencing. The terrace contained shells in living position. The sea level calculated from this site is  $17.8 \pm 6.1$  m.

400 Schellmann (1998) and Schellmann and Radtke (2000) described two MIS 5 beach ridges located north of Camarones. The first site (Pa 47), has a calculated sea level of  $6.5 \pm 5.8$  m. Pappalardo et al. (2015) dated this deposit using the U/Th method on a mollusc shell and confirmed the MIS 5 assignment, but there were not enough details to narrow the vertical uncertainty. The large vertical uncertainty is a result of the thickness of the deposit. Another site with a beach ridge (Pa 30) has a calculated sea level of  $12.8 \pm 3.3$  m, but this should be regarded as lower quality since the geological context was not described.

405 Rostami et al. (2000) investigated a MIS 5 marine terrace located about 12 km south of Camarones. Since there was no map or coordinates in the paper, we assign low quality score to this indicator. About 1 m below the surface were shells in living position. The calculated sea level is  $15.8 \pm 4.0$  m.

Pappalardo et al. (2015) described three additional locations that were dated by U/Th method with mollusc shells, and correlate with MIS 5. Two of these were located north of the site Pa 47. The first was a beach ridge, with a calculated sea level  
 410 of  $4.8 \pm 5.6$  m. Another site, a beach deposit, has a calculated sea level of  $6.1 \pm 2.4$  m. A site south of Camarones, also dated to MIS 5, with a calculated sea level of  $7.8 \pm 1.5$  m. This site is the same as shown in fig. 4. The later two sites described only the elevation of the shell samples and without reference to the thickness of the unit, so these uncertainties are underestimated.

#### 5.4.5 Bahía Bustamante

Cionchi (1987) investigated terraces in Bahía Bustamante. These sites are undated and the terrace surface elevations are esti-  
 415 mated from topography maps supplemented by field measurements (measured by altimetry). On the basis of elevation (25–29 m), Cionchi (1987) interpreted the lower of two Pleistocene terraces to represent the last interglacial. If their interpretation of MIS 5 age is accepted, the deposit implies a sea level of  $26.4 \pm 6.2$  m. Rutter et al. (1989, 1990) investigated a beach ridge associated with the marine terrace, and, based on amino acid values and ESR dates of mollusc shells, concluded that the beach ridge predates the last interglacial. Therefore, we do not accept the original assignment of MIS 5 age. Isola et al. (2011) mapped this  
 420 area, but did not interpret any marine terraces in Bahía Bustamante, and rather show a series of beach ridges. The interpretation of marine terrace landforms being present should be treated with caution.

Schellmann (1998) and Schellmann and Radtke (2000) sampled a number of beach ridge and beach deposits that were interpreted to be MIS 5 in age on the basis of ESR dates. Location Pa 41 has beach deposits, with a calculated sea level of



8.3±2.8 m. Beach ridges at sites Pa 55 and Pa 98 have a calculated sea level of 14.2±3.7 m, but these are regarded as poor quality since there was no stratigraphic context. A beach ridge at site Pa 97 provides a calculated sea level of 5.9±2.3 m, though the ESR dates from this location are somewhat older than MIS 5. Field sites sites Pa 37, Pa 38, Pa 96 and Pa 95 are located in one beach ridge system. Two well described outcrops consisting of beach ridge and beach facies within this system provide calculated sea levels of 12.8±5.6 m and 9.5±4.9 m, respectively. Finally, a beach ridge at site Pa 99 has a calculated sea level of 8.3±2.3 m, though this must be regarded as a poor indicator because there are no details given on the outcrop.

## 5.5 Patagonia: Santa Cruz Province

Santa Cruz Province has data at four locations (Fig. 9).

### 5.5.1 Caleta Olivia

Codignotto (1983) reported a marine terrace at 12-17 m, which we assume refers to the surface of the terrace, at Bahía Lángara, south of Caleta Olivia, with marine shells in living position associated with gravel deposits. These shells provided minimum radiocarbon ages. The calculated sea level from this site is 12.3±4.0 m.

Schellmann (1998) investigated a beach ridge south of Caleta Olivia. Mollusc shell samples, retrieved from two sample locations 1 km apart, were dated to MIS 5 using ESR dating. The two sampled locations were about 1 km apart. Both sites have beach ridge deposits. The site Pa 70 has an calculated sea level of 14.0±8.5 m, while Pa 71 was 10.8±9.0 m. The site Pa 71 is likely the same location that is pictures on Fig. 3. This site was also investigated by Ribolini et al. (2014). They were primarily interested in wedge structures, and a more complete description of the unit is not given.

Rostami et al. (2000) investigated two marine terraces, one north of Caleta Olivia and the other south. Mollusc shells collected from these sites were dated with U/Th and ESR methods, and had MIS 5 ages. Since there is no map, the exact location of these sites had to be guessed based on descriptions of the location in the text. Both terrace surfaces were reported to have the same elevation, have a calculated sea level of 15.5±4.0 m.

### 5.5.2 Mazarredo

Schellmann (1998) investigated beach ridge deposits at Mazarredo, constraining them to MIS 5 by ESR analysis of mollusc shells. The calculated sea level is 12.2±3.4 m. This indicator is assigned a low quality score, since there was no detailed stratigraphic description of this site.

Rostami et al. (2000) correlated a marine terrace at Punta Mazarredo to MIS 5 using U/Th dating of mollusc shell. The calculated sea level is 15.9±4.0 m. The location is described as, “130-150 km from Caleta Olivia” (Rostami et al., 2000, pg. 1506). Using satellite imagery, we identified raised shorelines at this approximate distance from Caleta Olivia and have tentatively assigned the location of the sea level indicator to these coordinates within WALIS. This is about 55 km east of the location described by Schellmann (1998).



### 5.5.3 Puerto Deseado

- 455 Rutter et al. (1989) sampled mollusc shells with AAR at three beach deposits Puerto Deseado area from three different elevations. The intermediate elevation deposit, with an elevation stated to be 20-25 m was interpreted as being last interglacial in age based on relative AAR values. The mollusc samples were taken from the top 3 m of a 4 m thick layer of beach gravels. The sea level calculated from this deposit is  $22.2 \pm 7.1$  m. Rutter et al. (1990) and Radtke (1989) reported ESR dates from this deposit that were minimum limiting ( $>415$  ka), so they reinterpreted this deposit to be older than the last interglacial.
- 460 Several more recent studies have investigated features interpreted as being MIS 5 in age, but since they did not perform additional dating, and elevation measurement techniques were not stated, they do not reduce the uncertainty on the entered index point. Bini et al. (2017) reported on the inner margin and an abrasion notch of the marine terrace they correlated to MIS 5, with elevations between 21.4 and 23.4 m. They interpreted these features to represent a paleo-sea level of about 21 m. However, these features cannot be directly dated. Zanchetta et al. (2014) reported on a sandy gravel deposit that they correlated
- 465 to MIS 5e with a peak elevation of 11-13 m, but since they were not marine deposits, they do not narrow down the position of sea level. Ribolini et al. (2014) reported on a marine unit they interpreted as MIS 5 at a site west of the town of Puerto Deseado. Schellmann (1998) appears to have dated this deposit with ESR, which returned non-finite ages and is therefore likely older than MIS 5.

### 5.5.4 San Julián

- 470 The first study to present a dated last interglacial shoreline deposit in San Julian was presented by Radtke (1989). They identify a marine terrace surface at 8-10 m, but provide no additional description. The elevation range is exactly the same as what is stated by Feruglio (1950), and we suspect that the elevation was not measured and simply taken from the older publication. ESR dating of mollusc shells from the underlying deposit indicates this terrace is MIS 5 in age. The calculated sea level from this landform is  $7.6 \pm 3.4$  m.
- 475 Schellmann (1998) reported MIS 5 aged deposits at two locations. Southwest of San Julián at site Pa 122/123 a sequence of sublittoral facies, overlain by beach facies, followed by beach ridge facies that records a sea-level regression. ESR analysis of mollusc shells retrieved from two separate shell layers within the beach ridge facies indicated MIS 5 deposition. The beach facies has an calculated sea level of  $6.7 \pm 3.8$  m, while the overlying beach ridge facies implies a sea level of  $5.1 \pm 2.9$  m. The second location described by Schellmann (1998), Pa 61, is located east of San Julian, but there is not enough information on
- 480 the stratigraphic context to infer sea level.

Rostami et al. (2000) reported a marine terrace overlying a wave cut platform, about 2 km south of San Julián. U/Th dates on *Mytilus* sp. shells were consistent with a MIS 5 age. The calculated sea level of the terrace surface is  $15.1 \pm 4.2$  m.

## 5.6 Patagonia: Tierra del Fuego

Tierra del Fuego, which includes Argentina and Chile, has data at two locations (Fig. 9).



## 485 5.6.1 Northeastern Tierra del Fuego, Argentina

Codignotto (1983, 1984) reported a Pleistocene beach deposit near Estancia La Sara to the south-southeast of Bahía San Sebastian. They collected several mollusc shell samples which provided minimum radiocarbon ages. The elevation of the deposit was described as 20-22 m, with shells found up to 5 m below the surface. If this is a MIS 5 deposit, the calculated sea level of this deposit is  $17.5 \pm 5.6$  m.

490 Rutter et al. (1989) sampled a beach deposit near Estancia La Sara that they interpreted as being Pleistocene based elevated AAR values on mollusc shells relative to Holocene deposits. The samples were taken from a 5 m section of foreshore beach gravels, at 2-5 m depth of burial below. Meglioli (1992) stated additional, unpublished AAR samples indicated an MIS 5 age. Bujalesky et al. (2001); Bujalesky (2007) and Bujalesky and Isla (2006) collected a U/Th sample that was consistent with an MIS 5 assignment. They measured an elevation of 14.3 m at the top of this beach deposit using GPS. Their coordinates and  
 495 site description indicate it was the same location as Rutter et al. (1989), but since the stratigraphic details are limited, we apply an additional 1 m of uncertainty to this measurement. The calculated sea level is  $13.4 \pm 3.7$  m.

Bujalesky and Isla (2006) and Bujalesky (2007, 2012) also described Upper Pleistocene gravel beaches in Río Grande, Cabo Peñas, Ensenada La Colonia and Río Fuego at 6-8 m above the present storm berm and have an inferred a MIS 5 age. These landforms have not been dated, so we do not include them in our database.

## 500 5.6.2 Puerto Williams, Isla Navarino, Chile

This beach deposit outcrop is located about 10 km east of Puerto Williams. The deposit is overlain by Wisconsin aged (post MIS 5e) glacial till (Rabassa et al., 2008). They noted that beach deposit had not been deformed or displaced by glacial action. A minimum radiocarbon age on a shell fragment was reported. The calculated sea level from this deposit is  $11.0 \pm 1.5$  m. The fossil assemblage of marine molluscs indicates that marine conditions were similar to present (Gordillo and Isla, 2011; Gordillo  
 505 et al., 2010).

## 6 Further details

There is an extensive survey of fauna diversity at many MIS 5 sites in Santa Cruz province (Aguirre et al., 2009), Camarones area (Aguirre et al., 2006), Bahía Bustamante (Aguirre et al., 2005b), Caleta Olivia (Aguirre, 2003) and Puerto Lobos (Aguirre et al., 2005a). Though these studies do not add any new sea level index points, the surveys indicate that environmental condi-  
 510 tions in MIS 5 were likely cooler than the Holocene in Patagonia. This is in contrast to the Rio de la Plata region in Argentina and Uruguay, which indicates warmer than present environmental conditions (Martínez et al., 2016).

### 6.1 Last Interglacial sea level fluctuations

The analytical precision of ESR and U/Th on mollusc shell limits the applicability of the methods to discerning sea-level oscillations within the Last Interglacial.



## 515 6.2 Other interglacials

Most of the studies that investigated MIS 5 shorelines also reported older deposits at higher elevations. Some of these have been correlated to MIS 7, 9 and 11 on the basis of ESR and U/Th dates (Schellmann, 1998; Rostami et al., 2000; Schellmann and Radtke, 2000; Pappalardo et al., 2015).

## 6.3 Holocene sea level indicators

520 No standardized compilation of Holocene sea level indicators has been completed. However, one is in development (T. Shaw, *pers. comms*).

## 6.4 Controversies

Through the past four decades, there have been few points of contention on the interpretation of sea level proxies in south-eastern South America. One of the early controversies was on the interpretation of the age of finite aged radiocarbon dates  
 525 in Pleistocene deposits, and whether they should be considered to be minimum ages (González, 1992; Rutter et al., 1992). Most recent studies that report finite aged radiocarbon dates regard them as minimum ages due to the limitation of the method (*e.g.* Martínez et al., 2016). The other controversies described here will require more field observations and modelling work to resolve.

### 6.4.1 Shoreline angles

530 The review of Patagonian paleo-sea level by Pedoja et al. (2011) reported numerous altimetric measurements of shoreline angles. However, precise locations of these shorelines were not provided. Recent attempts by several of us in the field (EJG, AR, DDR, SR) to locate some of these shorelines, using the publication maps as a guide, were unsuccessful. Pappalardo et al. (2019) were also unsuccessful.

### 6.4.2 Tectonic uplift or glacial-isostatic adjustment of Argentinian shorelines

535 The Holocene and MIS 5 shorelines in Patagonia are elevated relative to canonical “eustatic” sea level values. On this basis, some prior authors have assumed that there is at least some tectonic uplift, generally on the order of a tenth of a millimeter per year (Rostami et al., 2000; Pedoja et al., 2011; Pappalardo et al., 2015). In contrast, Rutter et al. (1989), Radtke (1989) and Schellmann and Radtke (2010) proposed that the raised shoreline deposits were the result of glacial-isostatic adjustment (GIA), since the Holocene and MIS 5 highstand elevation is similar along the entire coast. González et al. (1988a) regarded the  
 540 Buenos Aires Province to be relatively stable, with the exception of the Bahía Blanca area, though this reasoning is based on ~~of~~ finite radiocarbon ages that we regard as minimum ages.

Few studies of GIA have been performed along the Argentinian coastline. Rostami et al. (2000) did calculations at sites along South America, but that model did not take into account shoreline migration, which means it neglects the loading effect of the flooding of the broad continental shelf off the coast of Patagonia as sea level rose following the Last Glacial Maximum





(details of the Patagonian Ice Sheet were not given). Reanalysis by Peltier and Drummond (2002) included the change of loading on the shelf, and they concluded that the effect was not significant. Peltier et al. (2015) compared the calculated sea level along the Argentinian coastline with the ICE-5G and ICE-6G reconstructions, both with and without rotational effects. They concluded that rotational feedback was detectable in the sea level signal in this region. However, they were only able to match the Holocene highstand with ICE-5G, which was the result of the impact of the thick Laurentide Ice Sheet on the degree 2 Stokes coefficient.

On fig. 11, we have plotted the calculated sea level from the PaleoMIST model by Gowan *et al.* (in review) at 7500 yr BP and 2500 yr BP along the entire Argentinian coast. This model is a global ice sheet reconstruction for the past 80 000 years, including the Patagonian Ice Sheet. Although this model is preliminary in the sense that it has not been directly compared with Holocene sea level indicators in Argentina, it demonstrates that GIA processes alone can explain sea level highstands that are well above present-day sea level. We show the results using two different Earth models, one with a continental style Earth rheology, and another with a rheology more appropriate for a place undergoing active tectonics. Regardless of the model, it shows that the coast of Argentina has large north-south and east-west variations in peak sea level, and that the timing of peak sea level may not be consistent along the length of the coast. This could mean that the peak sea level highstand that is documented in our database may represent different points in time within MIS 5. Unfortunately, the precision of the dating methods available is not sufficient to test this supposition.

On longer time scales, tectonics and dynamic topography have affected eastern Patagonia. For example, the Deseado Massif, located in Santa Cruz province west of Puerto Deseado, was uplifted and tilted after an asthenospheric window in the subducting slab opened due to the northward migration of the Chile Triple Junction (where the Nazca, South America and Antarctic Plates meet) (Guillaume et al., 2009). Most of the tilting and uplift happened from the Miocene to the early Pleistocene. It is unknown if this is still affecting the east coast of Patagonia. Only through additional GIA modelling studies and more precise elevation measurements of MIS 5 shoreline deposits, which is beyond the scope of this study, will it be possible to assess the relative magnitude of these effects.

## 6.5 Future research directions

The main problem when compiling this database is the lack of precise elevation measurements, and references to the indicative range of the landforms. Precise elevation measurements with differential GPS and modern analogues need to be acquired through further field surveys. This would improve the quality of the proxies that have been confidently assigned a MIS 5 age.

One recommendation for future work would be to find an indicative meaning for the Pleistocene deposits that were surveyed in Buenos Aries province. If this could be determined, it would provide index points for the entire coast of Argentina. Many of the sites described above have only been dated using minimum radiocarbon ages. Revisiting these sites for additional surveying and better geochronological constraints should be considered for future studies.



## 7 Conclusions

Chronologically constrained and inferred MIS 5 raised shoreline deposits and landforms are located along the entire south-eastern coast of South America. The quality of previously published features is generally low, due to the absence of precise elevation measurements, insufficient stratigraphic description or context, and the reliance on radiocarbon dating techniques that can only provide a minimum age constraint to the Pleistocene. Our contribution to the WALIS database should be seen as a starting point to improve measurement of MIS 5e southeastern South American shorelines.

## 8 Data availability

The southeastern South America database is available here (Gowan et al., 2020): <https://doi.org/10.5281/zenodo.3991597>. The description of the database fields can be found here (Rovere et al., 2020): <https://doi.org/10.5281/zenodo.3961543>.

**Author contributions.** E.J.G. was the main compiler of the sea level database and wrote the paper, with significant input from A.R., D.D.R. and S.R. The primary architect of the WALIS database was A.R. Further interpretation and validation of the dataset and input on the paper were contributed by A.M, M.L.A. and M.A..

**Competing interests.** No competing interests.

**Disclaimer.** The information contained in this database was the result of studies from many scientists over the course of several decades. Please cite the original sources of the data in addition to this database.

**Acknowledgements.** We thank K.R. Sandoval for assistance with Spanish and T. Lorscheid for assistance with German. E.J.G. was funded by Helmholtz Exzellenznetzwerks "The Polar System and its Effects on the Ocean Floor (POSY)" and Helmholtz Climate Initiative REKLIM (Regional Climate Change), a joint research project at the Helmholtz Association of German research centres (HGF). This study was also supported by the PACES-II program at the Alfred Wegener Institute and the Bundesministerium für Bildung und Forschung funded project, PalMod. The WALIS database was developed by the ERC Starting Grant "Warmcoasts" (ERC-StG-802414) and PALSEA. PALSEA is a working group of the International Union for Quaternary Sciences (INQUA) and Past Global Changes (PAGES), which in turn received support from the Swiss Academy of Sciences and the Chinese Academy of Sciences. The database structure was designed by A. Rovere, D. Ryan, T. Lorscheid, A. Dutton, P. Chutcharavan, D. Brill, N. Jankowski, D. Mueller, M. Bartz, E.J. Gowan and K. Cohen. Figures in this paper were plotted with the aid of Generic Mapping Tools (Wessel et al., 2013).



## 600 References

- Aguirre, M., Dellatorre, F., Codignotto, J., and Kokot, R.: Malacofauna y paleoambientes del Pleistoceno y Holoceno de Puerto Lobos-Bahía Cracker (norte de Patagonia, Argentina), in: *Actas XVI Congreso Geológico Argentino*, vol. 4, pp. 185–192, 2005a.
- Aguirre, M., Richiano, S., and Sirch, Y. N.: Palaeoenvironments and palaeoclimates of the Quaternary molluscan faunas from the coastal area of Bahía Vera-Camarones (Chubut, Patagonia), *Palaeogeography, Palaeoclimatology, Palaeoecology*, 229, 251–286, <https://doi.org/10.1016/j.palaeo.2005.06.025>, 2006.
- 605 Aguirre, M. L.: Late Pleistocene and Holocene palaeoenvironments in Golfo San Jorge, Patagonia: molluscan evidence, *Marine Geology*, 194, 3–30, [https://doi.org/https://doi.org/10.1016/S0025-3227\(02\)00696-5](https://doi.org/https://doi.org/10.1016/S0025-3227(02)00696-5), iGCP Project 437: Coastal Environmental Change During Sea-level Highstands, 2003.
- Aguirre, M. L. and Whatley, R. C.: Late Quaternary marginal marine deposits and palaeoenvironments from northeastern Buenos Aires Province, Argentina: a review, *Quaternary Science Reviews*, 14, 223–254, [https://doi.org/10.1016/0277-3791\(95\)00009-E](https://doi.org/10.1016/0277-3791(95)00009-E), 1995.
- 610 Aguirre, M. L., Bowen, D. Q., Sykes, G. A., and Whatley, R. C.: A provisional aminostratigraphical framework for late Quaternary marine deposits in Buenos Aires province, Argentina, *Marine geology*, 128, 85–104, [https://doi.org/10.1016/0025-3227\(95\)00058-7](https://doi.org/10.1016/0025-3227(95)00058-7), 1995.
- Aguirre, M. L., Sirch, Y. N., and Richiano, S.: Late Quaternary molluscan assemblages from the coastal area of Bahía Bustamante (Patagonia, Argentina): Paleoecology and paleoenvironments, *Journal of South American Earth Sciences*, 20, 13–32, <https://doi.org/10.1016/j.jsames.2005.05.006>, 2005b.
- 615 Aguirre, M. L., Richiano, S., Álvarez, M. F., and Eastoe, C.: Malacofauna cuaternaria del litoral norte de Santa Cruz (Patagonia, Argentina), *Geobios*, 42, 411–434, <https://doi.org/10.1016/j.geobios.2009.01.002>, 2009.
- Aliotta, S., Farinati, E., and Spagnuolo, J. O.: Sedimentological and taphonomical differentiation of Quaternary marine deposits, Bahía Blanca, Argentina, *Journal of Coastal Research*, 17, 792–801, 2001.
- 620 Bayarsky, A. and Codignotto, J. O.: Pleistoceno Holoceno marino en Puerto Lobos, Chubut, *Asociación Geológica Argentina, Revista*, 38, 91–99, 1982.
- Beilinson, E., Raigemborn, M. S., Rodriguez, S. G., Soibelzon, E., Gasparini, G. M., Calvo-Marcilese, L., Cusminsky, G. C., Mari, F., Iacona, F., and Soibelzon, L. H.: A multi-proxy approach to paleoenvironmental changes in the southwestern Río de la Plata area (Argentina) during Late Pleistocene, *Quaternary International*, 512, 6–17, <https://doi.org/10.1016/j.quaint.2019.01.010>, 2019.
- 625 Bini, M., Zanchetta, G., Ribolini, A., Salvatore, M. C., Baroni, C., Pappalardo, M., Isola, I., Isla, F. I., Fucks, E. E., Boretto, G. M., Morigi, C., Ragaini, L., Marzaioli, F., and Passariello, I.: Last interglacial sea-level highstand deduced from notches and inner margins of marine terraces at Puerto Deseado, Santa Cruz Province, Argentina, *Geografia Fisica E Dinamica Quaternaria*, 40, 29–39, <https://doi.org/10.4461/gfdq.2017.40.3>, 2017.
- Boretto, G., Gordillo, S., Cioccale, M., Colombo, F., and Fucks, E.: Multi-proxy evidence of Late Quaternary environmental changes in the coastal area of Puerto Lobos (northern Patagonia, Argentina), *Quaternary International*, 305, 188–205, <https://doi.org/10.1016/j.quaint.2013.02.017>, ranked habitats and the process of human colonization of South America, 2013.
- 630 Bujalesky, G. and Isla, F. I.: Depósitos cuaternarios de la costa atlántica fueguina, entre los cabos Peñas y Ewan, *Revista de la Asociación Geológica Argentina*, 61, 81–92, 2006.
- Bujalesky, G., Coronato, A., and Isla, F.: Ambientes glaciafluviales y litorales Cuaternarios de la región del Río Chico, Tierra del Fuego, Argentina, *Revista de la Asociación Geológica Argentina*, 56, 73–90, 2001.
- 635

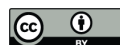

- Bujalesky, G. G.: Coastal geomorphology and evolution of Tierra del Fuego (Southern Argentina), *Geologica Acta: an international Earth Science Journal*, 5, 337–362, 2007.
- Bujalesky, G. G.: Tsunami Overtopping Fan and Erosive Scarps at Atlantic Coast of Tierra Del Fuego, *Journal of Coastal Research*, 28, 442–456, <https://doi.org/10.2112/JCOASTRES-D-11-00037.1>, 2012.
- 640 Cionchi, J. L.: Depósitos marinos cuaternarios de Bahía Bustamante, provincia del Chubut, *Revista de la Asociación Geológica Argentina*, 42, 61–72, 1987.
- Clarke, S. J. and Murray-Wallace, C. V.: Mathematical expressions used in amino acid racemisation geochronology—a review, *Quaternary Geochronology*, 1, 261–278, <https://doi.org/10.1016/j.quageo.2006.12.002>, 2006.
- Codignotto, J. O.: Depósitos elevados y/o de acreción Pleistoceno-Holoceno en la costa Fueguino-Patagónica, in: *Simposio Oscilaciones del nivel del mar durante el último hemicycle deglacial en la Argentina*, pp. 12–26, 1983.
- 645 Codignotto, J. O.: Estratigrafía y geomorfología del Pleistoceno-Holoceno costanero entre los paralelos 53°30'S y 42°00'S, Argentina, in: *IX Congreso Geológico Argentino*, vol. 3, pp. 513–519, 1984.
- Codignotto, J. O.: Cuaternario marino entre Tierra del Fuego y Buenos Aires, *Revista de la Asociación Geológica Argentina*, 42, 208–212, 1987.
- 650 Codignotto, J. O., Marcomini, S. C., and Santillana, S. N.: Terrazas marinas entre Puerto Deseado y Bahía Bustamante, Santa Cruz, Chubut, *Revista de la Asociación Geológica Argentina*, 43, 43–50, 1988.
- Creveling, J. R., Mitrovica, J. X., Clark, P. U., Waelbroeck, C., and Pico, T.: Predicted bounds on peak global mean sea level during Marine Isotope Stages 5a and 5c, *Quaternary Science Reviews*, 163, 193–208, <https://doi.org/10.1016/j.quascirev.2017.03.003>, 2017.
- Darwin, C.: Geological observations on South America: Being the third part of the geology of the voyage of the Beagle, under the command of Capt. Fitzroy, RN during the years 1832 to 1836, vol. 3, chap. 1 - On the elevation of the eastern coast of South America, pp. 1–26, Smith, Elder and Co., London, 1846.
- 655 Dumas, B., Hoang, C. T., and Raffy, J.: Record of MIS 5 sea-level highstands based on U/Th dated coral terraces of Haiti, *Quaternary International*, 145, 106–118, <https://doi.org/10.1016/j.quaint.2005.07.010>, 2006.
- Dutton, A. and Lambeck, K.: Ice volume and sea level during the last interglacial, *Science*, 337, 216–219, 2012.
- 660 Feruglio, E.: Descripción geológica de la Patagonia, vol. 3, chap. 25 - Las terrazas marinas, pp. 74–181, Dirección General de Yacimientos Petrolíferos Fiscales, Buenos Aires, 1950.
- Fucks, E., Aguirre, M., and Deschamps, C. M.: Late Quaternary continental and marine sediments of northeastern Buenos Aires province (Argentina): Fossil content and paleoenvironmental interpretation, *Journal of South American Earth Sciences*, 20, 45–56, <https://doi.org/10.1016/j.jsames.2005.05.003>, 2005.
- 665 Fucks, E., Aguirre, M. L., Schnack, E., Erra, G., and Ramos, N.: Rasgos litológicos y fosilíferos de la Formación Pascua (Pleistoceno Tardío) en su localidad tipo, provincia de Buenos Aires, in: *III Congreso Argentino de Cuaternario y Geomorfología*, Córdoba, Argentina, *Actas de Trabajos Tomo II*, pp. 727–736, 2006.
- Fucks, E., Charó, M., and Pisano, F.: Aspectos estratigráficos y geomorfológicos del sector oriental Patagónico Bonaerense, *Revista de la Sociedad Geológica de España*, 25, 29–44, 2012a.
- 670 Fucks, E., Schnack, E. J., and Charó, M.: Aspectos geológicos y geomorfológicos del sector N del golfo San Matías, Río Negro, Argentina, *Revista de la Sociedad Geológica de España*, 25, 95–105, 2012b.
- Fucks, E. E., Schnack, E. J., and Aguirre, M. L.: Nuevo ordenamiento estratigráfico de las secuencias marinas del sector continental de la Bahía Samborombón, provincia de Buenos Aires, *Revista de la Asociación Geológica Argentina*, 67, 27–39, 2010.

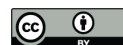

- Gasparini, G. M., Soibelzon, E., Deschamps, C., Francia, A., Beilinson, E., Soibelzon, L. H., and Tonni, E. P.: Continental vertebrates during  
675 the Marine Isotope Stage 3 (MIS 3) in Argentina, in: Marine Isotope Stage 3 in Southern South America, 60 KA BP-30 KA BP, pp.  
227–247, Springer, [https://doi.org/10.1007/978-3-319-40000-6\\_13](https://doi.org/10.1007/978-3-319-40000-6_13), 2016.
- González, M. A.: Discussion of: Rutter, N.W.; Radtke, U., and Schnack, E.J., 1990. Comparison of ESR and Amino Acid Data in correlating  
and dating Quaternary shorelines along the Patagonian Coast, Argentina. Journal of Coastal Research, 6 (2), 391–411., Journal of Coastal  
Research, 8, 496–502, <https://www.jstor.org/stable/4297992>, 1992.
- 680 González, M. A. and Guida, N. G.: Late Pleistocene Littoral Deposits from 33° to 40° S, Argentine Republic: Blake and Probable Lake  
Mungo Events – Magnetostratigraphic Geochronology, Journal of Coastal Research, 6, 357–366, <https://www.jstor.org/stable/4297685>,  
1990.
- González, M. A. and Ravizza, G.: Sedimentos estuáricos del Pleistoceno tardío y Holoceno en la Isla Martín García, Río de la Plata, Revista  
Asociación Geológica Argentina, 42, 231–243, 1987.
- 685 González, M. A., Weiler, N. E., and Guida, N. G.: Late Pleistocene transgressive deposits from 33° SL to 40° SL, Republic of Argentina,  
Journal of Coastal Research, SI, 39–47, <https://www.jstor.org/stable/44863320>, 1986.
- González, M. A., Weiler, N. E., and Guida, N. G.: Late Pleistocene and Holocene coastal behaviour from 33° to 40° south, Argentine  
Republic, Journal of Coastal Research, 4, 59–68, <https://www.jstor.org/stable/4297372>, 1988a.
- González, M. A., Weiler, N. E., and Guida, N. G.: Transgressive Deposits of the Mid-Wisconsin Interstadial from 33° to 40° south latitude,  
690 Argentine Republic: Reliability of <sup>14</sup>C Ages, Journal of Coastal Research, 4, 667–676, <https://www.jstor.org/stable/4297468>, 1988b.
- Gordillo, S. and Isla, F. I.: Faunistic changes between the Middle/Late Pleistocene and the Holocene on the Atlantic coast of Tierra del Fuego:  
molluscan evidence, Quaternary International, 233, 101–112, <https://doi.org/10.1016/j.quaint.2010.06.006>, 2011.
- Gordillo, S., Cusminsky, G., Bernasconi, E., Ponce, J., Rabassa, J., and Pino, M.: Pleistocene marine calcareous macro-and-microfossils of  
Navarino Island (Chile) as environmental proxies during the last interglacial in southern South America, Quaternary International, 221,  
695 159–174, <https://doi.org/10.1016/j.quaint.2009.10.025>, 2010.
- Gowan, E. J., Rovere, A., Ryan, D. D., Richiano, S., Montes, A., Pappalardo, M., and Aguirre, M. L.: Last interglacial (MIS 5e) sea-level  
proxies in southeastern South America, <https://doi.org/10.5281/zenodo.3991597>, 2020.
- Guillaume, B., Martinod, J., Husson, L., Roddaz, M., and Riquelme, R.: Neogene uplift of central eastern Patagonia: Dynamic response to  
active spreading ridge subduction?, Tectonics, 28, TC2009, <https://doi.org/10.1029/2008TC002324>, 2009.
- 700 Isla, F., Rutter, N., Schnack, E. J., and Zárate, M.: La transgresión belgranense en Buenos Aires. Una revisión a cien años de su definición,  
in: Revista Cuaternario y Ciencias Ambientales, vol. 4 of *Serie D*, pp. 3–14, Asociación Geológica Argentina, 2000.
- Isla, F. I. and Angulo, R. J.: Tectonic processes along the South America coastline derived from Quaternary marine terraces, Journal of  
Coastal Research, 32, 840–852, <https://doi.org/10.2112/JCOASTRES-D-14-00178.1>, 2016.
- Isola, I., Bini, M., Ribolini, A., Pappalardo, M., Consoloni, I., Fucks, E., Boretto, G., Ragaini, L., and Zanchetta, G.: Geomorphologic map  
705 of northeastern sector of San Jorge Gulf (Chubut, Argentina), Journal of Maps, 7, 476–485, <https://doi.org/10.4113/jom.2011.1203>, 2011.
- Lambeck, K. and Chappell, J.: Sea level change through the last glacial cycle, Science, 292, 679–686, 2001.
- Lanfredi, N. W., Pousa, J. L., and D’Onofrio, E. E.: Sea-level Rise and Related Potential Hazards on the Argentine Coast, Journal of Coastal  
Research, 14, 47–60, <https://doi.org/10.2112/04-0205.1>, 1998.
- Lisiecki, L. E. and Raymo, M. E.: A Pliocene-Pleistocene stack of 57 globally distributed benthic  $\delta^{18}\text{O}$  records, Paleoceanography, 20,  
710 PA1003, <https://doi.org/10.1029/2004PA001071>, 2005.



- Lorscheid, T. and Rovere, A.: The indicative meaning calculator–quantification of paleo sea-level relationships by using global wave and tide datasets, *Open Geospatial Data, Software and Standards*, 4, 10, <https://doi.org/10.1186/s4096>, 2019.
- Mangerud, J., Sønstegaard, E., and Sejrup, H.-P.: Correlation of the Eemian (interglacial) Stage and the deep-sea oxygen-isotope stratigraphy, *Nature*, 277, 189–192, <https://doi.org/10.1038/277189a0>, 1979.
- 715 Martínez, S., Ubilla, M., Verde, M., Perea, D., Rojas, A., Guérèquiz, R., and Piñeiro, G.: Paleoecology and geochronology of Uruguayan coastal marine Pleistocene deposits, *Quaternary Research*, 55, 246–254, <https://doi.org/10.1006/qres.2000.2204>, 2001.
- Martínez, S., del Río, C. J., and Rojas, A.: A Pleistocene (MIS 5e) mollusk assemblage from Ezeiza (Buenos Aires Province, Argentina), *Journal of South American Earth Sciences*, 70, 174–187, <https://doi.org/10.1016/j.jsames.2016.05.008>, 2016.
- Mauz, B., Vacchi, M., Green, A., Hoffmann, G., and Cooper, A.: Beachrock: a tool for reconstructing relative sea level in the far-field, *Marine*  
720 *Geology*, 362, 1–16, <https://doi.org/10.1016/j.margeo.2015.01.009>, 2015.
- Meglioli, A.: Glacial geology of southernmost Patagonia, the Strait of Magellan and northern Tierra del Fuego, Ph.D. thesis, Lehigh University, Bethlehem, PA, USA, 1992.
- Moseley, G. E., Smart, P. L., Richards, D. A., and Hoffmann, D. L.: Speleothem constraints on Marine Isotope Stage (MIS) 5 relative sea levels, Yucatan Peninsula, Mexico, *Journal of Quaternary Science*, 28, 293–300, <https://doi.org/10.1002/jqs.2613>, 2013.
- 725 Otvos, E. G.: Beach ridges–definitions and significance, *Geomorphology*, 32, 83–108, [https://doi.org/10.1016/S0169-555X\(99\)00075-6](https://doi.org/10.1016/S0169-555X(99)00075-6), 2000.
- Otvos, E. G.: The last interglacial stage: Definitions and marine highstand, North America and Eurasia, *Quaternary International*, 383, 158–173, <https://doi.org/10.1016/j.quaint.2014.05.010>, 2015.
- Pappalardo, M., Aguirre, M., Bini, M., Consoloni, I., Fucks, E., Hellstrom, J., Isola, I., Ribolini, A., and Zanchetta, G.: Coastal landscape evolution and sea-level change: a case study from Central Patagonia (Argentina), *Zeitschrift für Geomorphologie*, 59, 145–172, <https://doi.org/10.1127/0372-8854/2014/0142>, 2015.
- 730 Pappalardo, M., Baroni, C., Bini, M., Isola, I., Ribolini, A., Salvatore, M. C., and Zanchetta, G.: Challenges in relative sea-level change assessment highlighted through a case study: The central coast of Atlantic Patagonia, *Global and Planetary Change*, 182, 103 008, 2019.
- Pedoja, K., Regard, V., Husson, L., Martinod, J., Guillaume, B., Fucks, E., Iglesias, M., and Weill, P.: Uplift of Quaternary shorelines in eastern Patagonia: Darwin revisited, *Geomorphology*, 127, 121–142, <https://doi.org/10.1016/j.geomorph.2010.08.003>, 2011.
- 735 Peltier, W. and Drummond, R.: A “broad-shelf effect” upon postglacial relative sea level history, *Geophysical Research Letters*, 29, 10–1, <https://doi.org/10.1029/2001GL014273>, 2002.
- Peltier, W. R., Argus, D. F., and Drummond, R.: Space geodesy constrains ice age terminal deglaciation: The global ICE-6G\_C (VM5a) model, *Journal of Geophysical Research: Solid Earth*, 120, 450–487, <https://doi.org/10.1002/2014JB011176>, 2015.
- 740 Perillo, G. M. E.: Definitions and geomorphologic classifications of estuaries, in: *Geomorphology and sedimentology of estuaries*, edited by Perillo, G. M. E., vol. 53 of *Developments in Sedimentology*, pp. 17–47, Elsevier Science BV Amsterdam, 1995.
- Pirazzoli, P. A.: Marine terraces, pp. 632–633, Springer, Berlin, 2005.
- Potter, E.-K., Esat, T. M., Schellmann, G., Radtke, U., Lambeck, K., and McCulloch, M. T.: Suborbital-period sea-level oscillations during marine isotope substages 5a and 5c, *Earth and Planetary Science Letters*, 225, 191–204, 2004.
- 745 Rabassa, J., Gordillo, S., Ocampo, C., and Hurtado, P. R.: The southernmost evidence for an interglacial transgression (Sangamon?) in South America. First record of upraised Pleistocene marine deposits in Isla Navarino (Beagle Channel, Southern Chile), *Geologica Acta*, 6, 251–258, <https://doi.org/10.1344/105.000000254>, 2008.
- Radtke, U.: How to avoid ‘useless’ radiocarbon dating, *Nature*, 333, 307–308, <https://doi.org/10.1038/333307b0>, 1988.





- Radtke, U.: Marine Terrassen und Korallenriffe – Das Problem der quartären Meeresspiegelschwankungen erläutert an Fallstudien aus Chile, Argentinien und Barbados., Tech. Rep. 27, Düsseldorf, 1989.
- Ribolini, A., Aguirre, M., Baneschi, I., Consoloni, I., Fucks, E., Isola, I., Mazzarini, F., Pappalardo, M., Zanchetta, G., and Bini, M.: Holocene Beach Ridges and Coastal Evolution in the Cabo Raso Bay (Atlantic Patagonian Coast, Argentina), *Journal of Coastal Research*, 27, 973–983, <https://doi.org/10.2112/JCOASTRES-D-10-00139.1>, 2011.
- Ribolini, A., Bini, M., Consoloni, I., Isola, I., Pappalardo, M., Zanchetta, G., Fucks, E., Panzeri, L., Martini, M., and Terrasi, F.: Late-755 pleistocene wedge structures along the Patagonian coast (Argentina): chronological constraints and palaeo-environmental implications, *Geografiska Annaler: Series A, Physical Geography*, 96, 161–176, <https://doi.org/10.1111/geoa.12038>, 2014.
- Roberts, A. P.: Geomagnetic excursions: knowns and unknowns, *Geophysical Research Letters*, 35, L17 307, <https://doi.org/10.1029/2008GL034719>, 2008.
- Rojas, A. and Martínez, S.: Marine Isotope Stage 3 (MIS 3) Versus Marine Isotope Stage 5 (MIS 5) Fossiliferous Marine De-760 posits from Uruguay, in: *Marine Isotope Stage 3 in Southern South America*, 60 KA BP–30 KA BP, pp. 249–278, Springer, [https://doi.org/10.1007/978-3-319-40000-6\\_14](https://doi.org/10.1007/978-3-319-40000-6_14), 2016.
- Rojas Buffet, M. A., Zaffaroni, J. C., and Martínez, S.: New molluscan records and palaeoecology of the Late Pleistocene marine assemblage from La Coronilla (Rocha, Uruguay), *Journal of Sedimentary Environments*, 3, 220–233, <https://doi.org/10.12957/jse.2018.39139>, 2018.
- Rossi, C., Mertz-Kraus, R., and Osete, M.-L.: Paleoclimate variability during the Blake geomagnetic excursion (MIS 5d) deduced from a 765 speleothem record, *Quaternary Science Reviews*, 102, 166–180, <https://doi.org/10.1016/j.quascirev.2014.08.007>, 2014.
- Rostami, K., Peltier, W. R., and Mangini, A.: Quaternary marine terraces, sea-level changes and uplift history of Patagonia, Argentina: comparisons with predictions of the ICE-4G (VM2) model of the global process of glacial isostatic adjustment, *Quaternary Science Reviews*, 19, 1495–1525, [https://doi.org/10.1016/S0277-3791\(00\)00075-5](https://doi.org/10.1016/S0277-3791(00)00075-5), 2000.
- Rovere, A., Raymo, M. E., Vacchi, M., Lorscheid, T., Stocchi, P., Gomez-Pujol, L., Harris, D. L., Casella, E., O’Leary, M. J., and Hearty, 770 P. J.: The analysis of Last Interglacial (MIS 5e) relative sea-level indicators: Reconstructing sea-level in a warmer world, *Earth-Science Reviews*, 159, 404–427, 2016.
- Rovere, A., Ryan, D., Murray-Wallace, C., Simms, A., Vacchi, M., Dutton, A., Lorscheid, T., Chutcharavan, P., Brill, D., Bartz, M., Jankowski, N., Mueller, D., Cohen, K., and Gowan, E.: Descriptions of database fields for the World Atlas of Last Interglacial Shorelines (WALIS), <https://doi.org/10.5281/zenodo.3961544>, 2020.
- Rutter, N., Schnack, E. J., del Rio, J., Fasano, J. L., Isla, F. I., and Radtke, U.: Correlation and dating of Quaternary littoral zones along the 775 Patagonian coast, Argentina, *Quaternary Science Reviews*, 8, 213–234, [https://doi.org/10.1016/0277-3791\(89\)90038-3](https://doi.org/10.1016/0277-3791(89)90038-3), 1989.
- Rutter, N., Radtke, U., and Schnack, E. J.: Comparison of ESR and amino acid data in correlating and dating Quaternary shorelines along the Patagonian coast, Argentina, *Journal of Coastal Research*, 6, 391–411, <https://www.jstor.org/stable/4297690>, 1990.
- Rutter, N., Radtke, U., and Schnack, E. J.: Reply to Discussion of Dr. M.A. Gonzales on Our Paper “Comparison of ESR and Amino 780 Acid Data in Correlating and Dating Quaternary Shorelines along the Patagonian Coast, Argentina” in *Journal of Coastal Research*. 6(2), 391–412., *Journal of Coastal Research*, 8, 503, 1992.
- Schellmann, G.: Jungkänozoische Landschaftsgeschichte Patagoniens (Argentinien): andine Vorlandvergletscherungen, Talentwicklung und marine Terrassen, vol. 29 of *Essener geographische Arbeiten*, Klartext, Essen, 1. auflage edn., teilw. zugl.: Essen, Univ., Habil.-Schr. 1997 u.d.T.: Schellmann, Gerhard: Andine Vorlandvergletscherungen und marine Terrassen, 1998.





- 785 Schellmann, G. and Radtke, U.: Electron spin resonance (ESR) techniques applied to mollusc shells from South America (Chile, Argentina) and implications for palaeo sea-level curve, *Quaternary Science Reviews*, 16, 465–475, [https://doi.org/10.1016/S0277-3791\(96\)00104-7](https://doi.org/10.1016/S0277-3791(96)00104-7), 1997.
- Schellmann, G. and Radtke, U.: ESR dating stratigraphically well-constrained marine terraces along the Patagonian Atlantic coast (Argentina), *Quaternary International*, 68, 261–273, [https://doi.org/10.1016/S1040-6182\(00\)00049-5](https://doi.org/10.1016/S1040-6182(00)00049-5), 2000.
- 790 Schellmann, G. and Radtke, U.: Timing and magnitude of Holocene sea-level changes along the middle and south Patagonian Atlantic coast derived from beach ridge systems, littoral terraces and valley-mouth terraces, *Earth-Science Reviews*, 103, 1–30, <https://doi.org/10.1016/j.earscirev.2010.06.003>, 2010.
- Shennan, I.: Handbook of sea-level research, chap. 2, pp. 3–25, John Wiley & Sons, Ltd, <https://doi.org/10.1002/9781118452547.ch2>, 2015.
- Surić, M., Richards, D. A., Hoffmann, D. L., Tibljaš, D., and Juračić, M.: Sea-level change during MIS 5a based on submerged speleothems from the eastern Adriatic Sea (Croatia), *Marine Geology*, 262, 62–67, <https://doi.org/10.1016/j.margeo.2009.03.005>, 2009.
- 795 Tamura, T.: Beach ridges and prograded beach deposits as palaeoenvironment records, *Earth-Science Reviews*, 114, 279–297, <https://doi.org/10.1016/j.earscirev.2012.06.004>, 2012.
- Trebino, L. G.: Geomorfología y evolución de la costa en los alrededores del pueblo de San Blas, Provincia de Buenos Aires, *Revista de la Asociación Geológica Argentina*, 42, 9–22, 1987.
- 800 Weiler, N. E.: Niveles marinos del Pleistoceno tardío y Holoceno en Bahía Anegada, Provincia de Buenos Aires: geocronología y correlaciones, *Revista de la Asociación Geológica Argentina*, 48, 207–216, 1993.
- Weiler, N. E., González, M. A., and Guida, N. G.: Niveles marinos del Pleistoceno tardío en Cañada de Arregui, Partido de Magdalena, provincia de Buenos Aires, *Revista Asociación Geológica Argentina*, 42, 92–98, 1988.
- Wessel, P., Smith, W. H., Scharroo, R., Luis, J., and Wobbe, F.: Generic mapping tools: improved version released, *Eos, Transactions American Geophysical Union*, 94, 409–410, <https://doi.org/10.1002/2013EO450001>, 2013.
- 805 Wood, R.: From revolution to convention: the past, present and future of radiocarbon dating, *Journal of Archaeological Science*, 56, 61–72, <https://doi.org/10.1016/j.jas.2015.02.019>, 2015.
- Zanchetta, G., Bini, M., Isola, I., Pappalardo, M., Ribolini, A., Consoloni, I., Boretto, G., Fucks, E., Ragaini, L., and Terrasi, F.: Middle- to late-Holocene relative sea-level changes at Puerto Deseado (Patagonia, Argentina), *The Holocene*, 24, 307–317, <https://doi.org/10.1177/0959683613518589>, 2014.
- 810 Zárate, M., Kemp, R., and Toms, P.: Late Quaternary landscape reconstruction and geochronology in the northern Pampas of Buenos Aires province, Argentina, *Journal of South American Earth Sciences*, 27, 88–99, <https://doi.org/10.1016/j.jsames.2008.10.001>, 2009.
- Zecchin, M., Nalin, R., and Roda, C.: Raised Pleistocene marine terraces of the Crotone peninsula (Calabria, southern Italy): facies analysis and organization of their deposits, *Sedimentary geology*, 172, 165–185, <https://doi.org/10.1016/j.sedgeo.2004.08.003>, 2004.

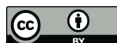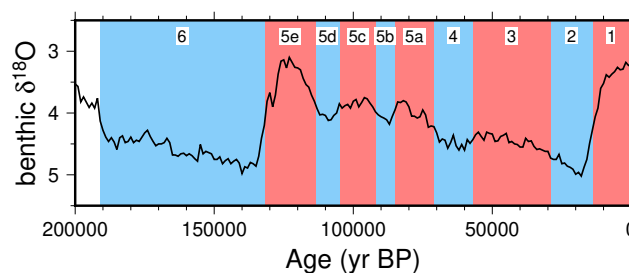

**Figure 1.** Definition of Marine Isotope Stages. The black line is the LR04 benthic  $\delta^{18}\text{O}$  stack (Lisiecki and Raymo, 2005). The MIS stages denoted in red are warm interglacial and interstadial periods, while blue areas are colder glacial and stadial periods. The MIS 5 substage boundaries are from Otvos (2015), while the others are defined by Lisiecki and Raymo (2005).

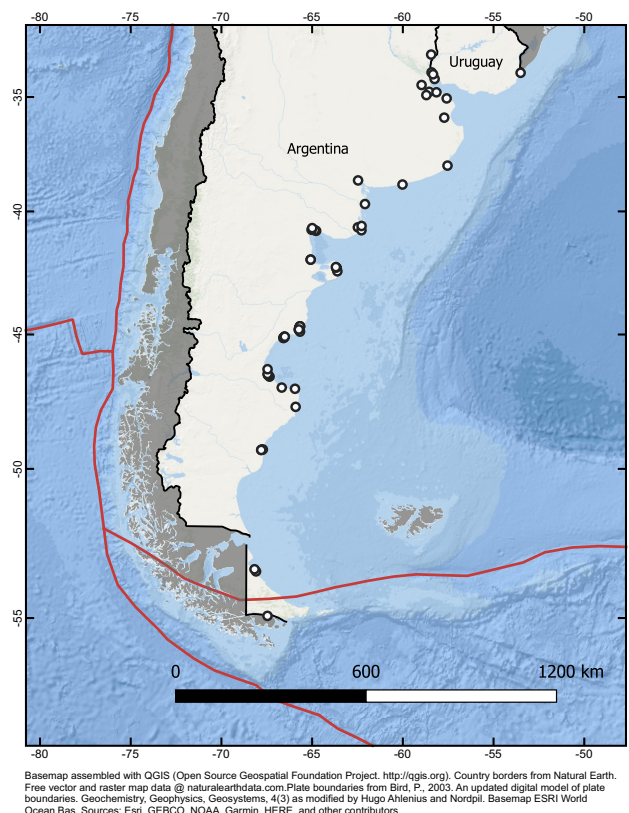

**Figure 2.** MIS 5 sea-level indicators along the southeastern South America coastline (black circles).

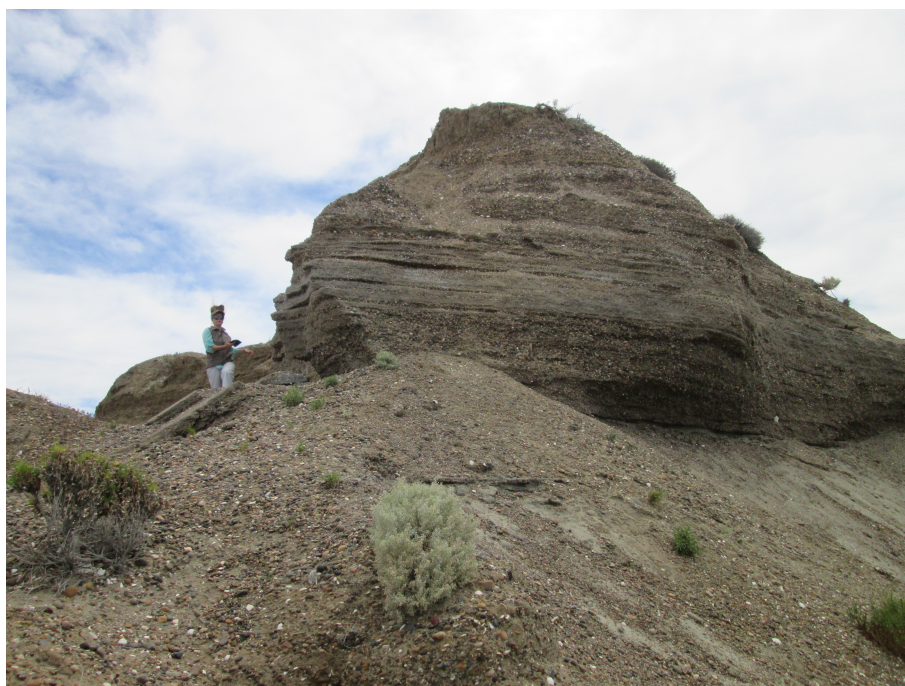

**Figure 3.** MIS 5 beach deposit near Caleta Olivia. The photo was taken on the front side of the beach deposit.

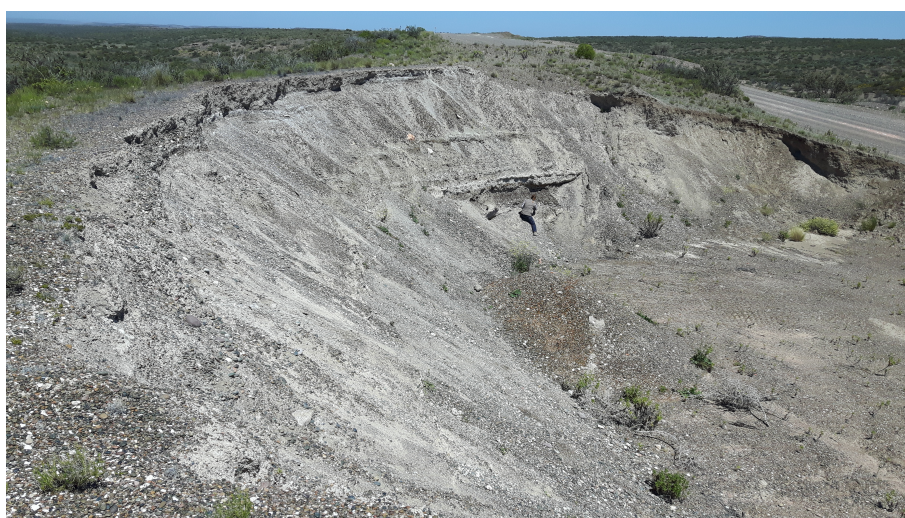

**Figure 4.** MIS 5 beach ridge deposit near Camarones. The photo illustrates the back side of the beach ridge, with the sea located on the left side of the photo.



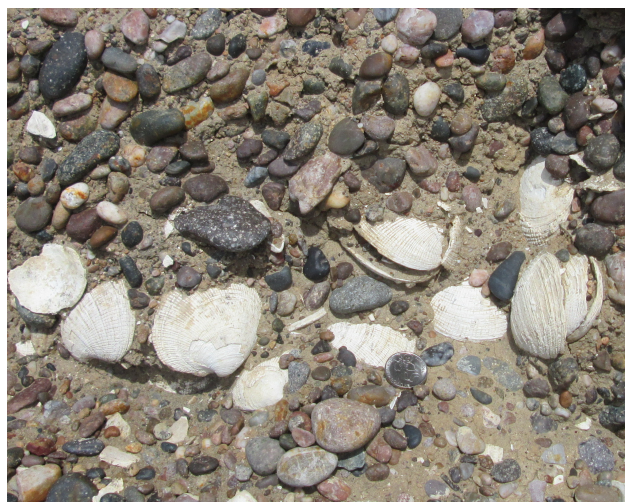

**Figure 5.** Well preserved MIS 5 aged fossil shells from a deposit near Caleta Olivia.

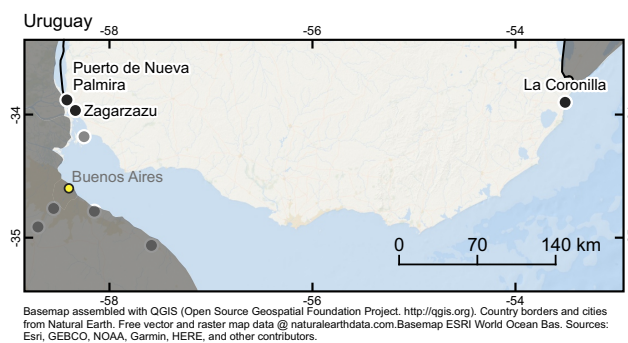

**Figure 6.** MIS 5 sea-level indicators in Uruguay (black circles).

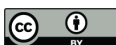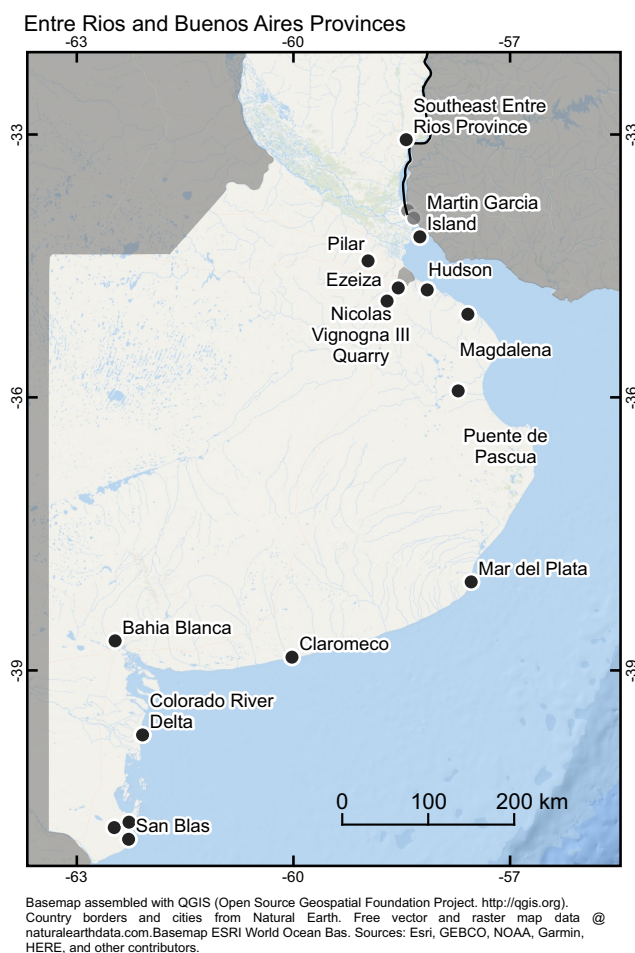

**Figure 7.** MIS 5 sea-level indicators in Entre Rios and Buenos Aires provinces, Argentina (black circles).

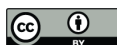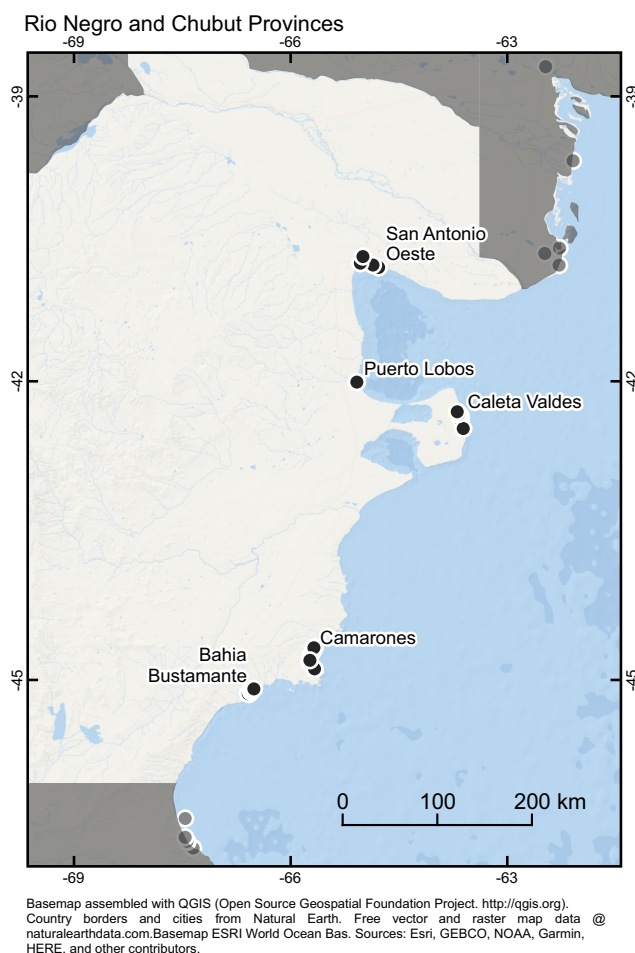

**Figure 8.** MIS 5 sea-level indicators in Rio Negro and Chubut provinces, Argentina (black circles).

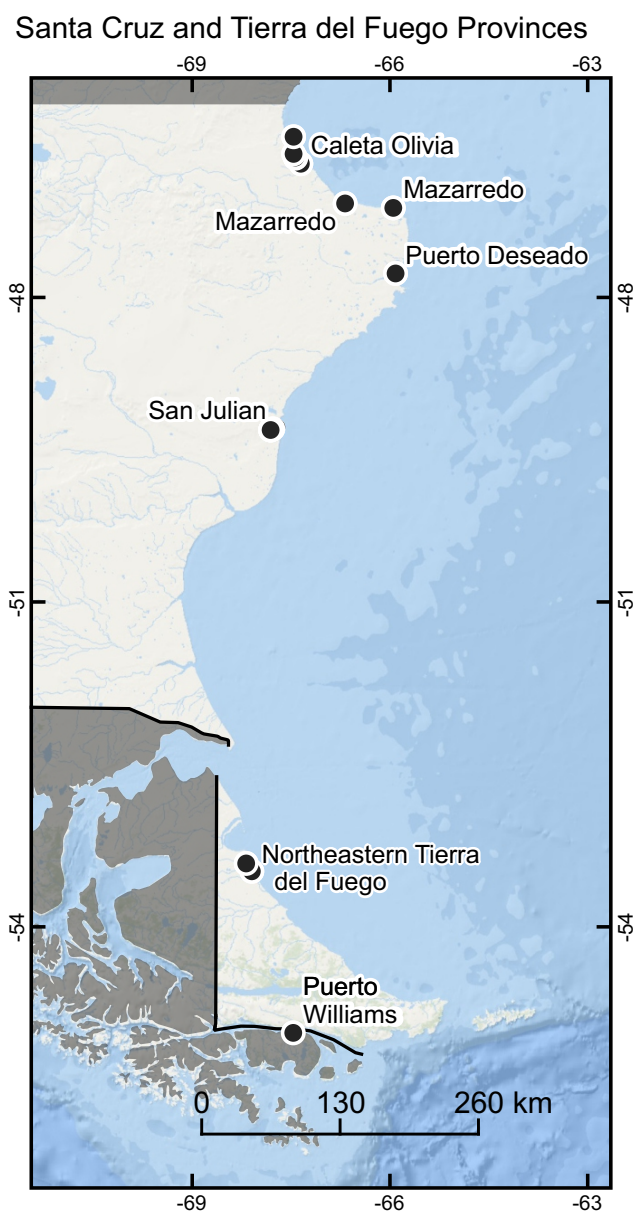

Basemap assembled with QGIS (Open Source Geospatial Foundation Project. <http://qgis.org>). Country borders and cities from Natural Earth. Free vector and raster map data @ [naturalearthdata.com](http://naturalearthdata.com). Basemap ESRI World Ocean Bas. Sources: Esri, GEBCO, NOAA, Garmin, HERE, and other contributors.

**Figure 9.** MIS 5 sea-level indicators in Santa Cruz province, Argentina, and Tierra del Fuego (Argentina and Chile) (black circles).



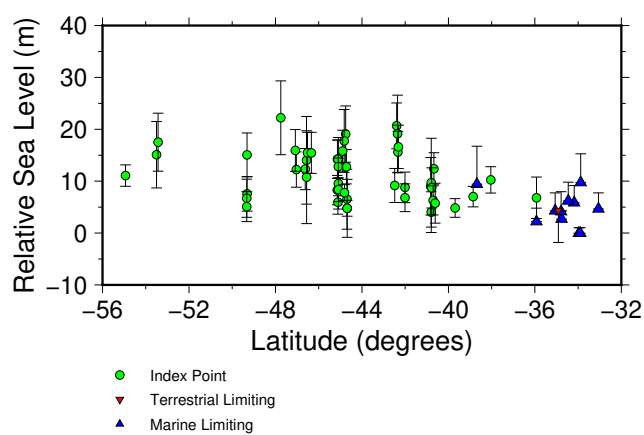

**Figure 10.** Plot showing the elevation of possible MIS 5 sea level deposits in Argentina.

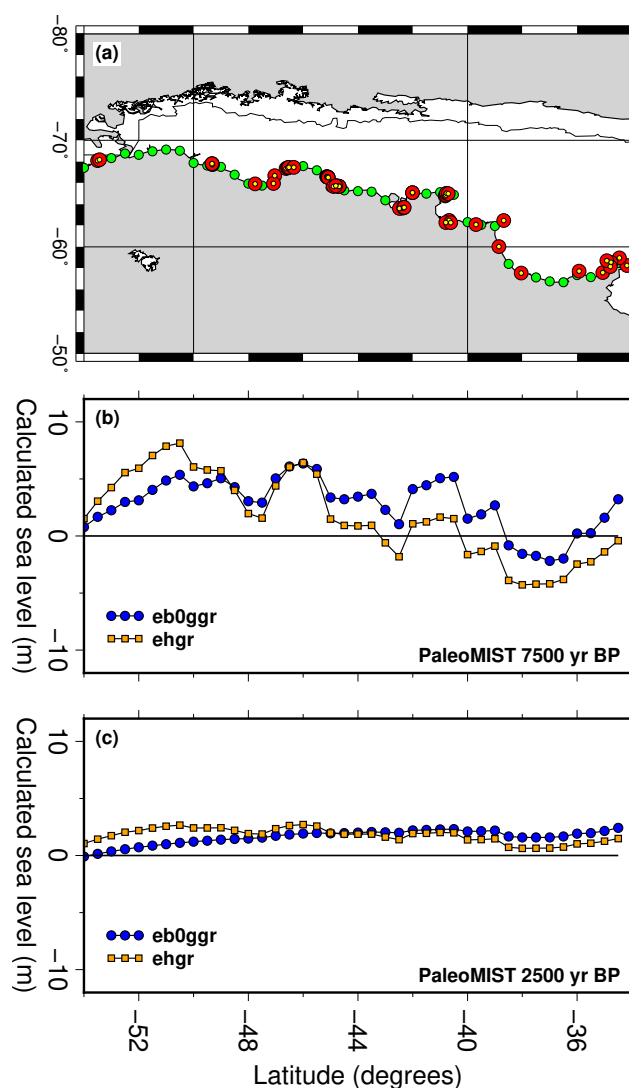

**Figure 11.** Calculated sea level along the coast of Argentina. We use the PaleoMIST ice sheet reconstruction (Gowan *et al.*, in review) to illustrate the variability of sea level. (a) Map showing where sea level was calculated (green dots) and the location of sea level indicators described in our database (red dots). Calculated sea level at (b) 7500 yr BP (approximately when Holocene minimal ice extent was reached) and (c) 2500 yr BP. The results of calculated sea level with two different Earth models are shown. ehgr (continental style Earth model): 120 km thick elastic lithosphere,  $4 \times 10^{20}$  Pa s upper mantle and  $4 \times 10^{22}$  Pa s lower mantle. eb0ggr (tectonically active style Earth model): 60 km thick elastic lithosphere, a 160 km thick layer below that at  $10^{19}$  Pa s,  $4 \times 10^{20}$  Pa s upper mantle and  $4 \times 10^{22}$  Pa s lower mantle.



**Table 1.** Terrace levels identified by Feruglio (1950)

| Terrace Name | Elevation (m) | Type location                     |
|--------------|---------------|-----------------------------------|
| VI           | 8-10          | Comodoro Rivadavia                |
| V            | 15-18         | Puerto Mazarredo                  |
| IV           | 35-40         | Escarpado Notre (Puerto Deseado)  |
| III          | 70-80         | Camarones                         |
| II           | 104-140       | Cabo Tres Puntas (Puerto Deseado) |
| I            | 170-186       | Cerro Laciár                      |



**Table 2.** Different types of RSL indicators reviewed in this study.

| Name of RSL indicator      | Description of RSL indicator                                                                                                                                                                                                                                                                                                                                                                                      | Description of RWL                             | Description of IR                                                                                                                                                                                                                            | Indicator reference(s)                        |
|----------------------------|-------------------------------------------------------------------------------------------------------------------------------------------------------------------------------------------------------------------------------------------------------------------------------------------------------------------------------------------------------------------------------------------------------------------|------------------------------------------------|----------------------------------------------------------------------------------------------------------------------------------------------------------------------------------------------------------------------------------------------|-----------------------------------------------|
| Marine Terrace             | Defined by Pirazzoli (2005) as “any relatively flat surface of marine origin”. Definition of indicative meaning from Rovere et al. (2016).                                                                                                                                                                                                                                                                        | (Storm wave swash height + Breaking depth) / 2 | Storm wave swash height - Breaking depth                                                                                                                                                                                                     | Mauz et al. (2015); Rovere et al. (2016)      |
| Beach deposit or beachrock | From Mauz et al. (2015): “Fossil beach deposits may be composed of loose sediments, sometimes slightly cemented. Beachrocks are lithified coastal deposits that are organized in sequences of slabs with seaward inclination generally between 5° and 15°.” Definition of indicative meaning from Rovere et al. (2016).                                                                                           | (Ordinary berm + breaking depth)/2             | Ordinary berm - breaking depth                                                                                                                                                                                                               | Mauz et al. (2015); Rovere et al. (2016)      |
| Beach ridge                | Otvos (2000): “stabilized, relict intertidal and supratidal, eolian and wave-built shore ridges that may consist of either siliciclastic or calcareous clastic matter of a wide range of clasts dimensions, from fine sand to cobbles and boulders”. Definition of indicative meaning from Rovere et al. (2016).                                                                                                  | (Storm wave swash height + Ordinary berm)/2    | Storm wave swash height - Ordinary berm                                                                                                                                                                                                      | Otvos (2000)<br>Rovere et al. (2016)          |
| Lagoonal deposit           | Lagoonal deposits consist of silty and clayey sediments, frequently characterized by the presence of brackish or marine water fauna (Rovere et al., 2016). Usually, lagoon sediments are horizontally laminated (Zecchin et al., 2004). Definition of indicative meaning from Rovere et al. (2016).                                                                                                               | (Mean Lower Low Water + modern Lagoon depth)/2 | Mean Lower Low Water - modern Lagoon depth                                                                                                                                                                                                   | Rovere et al. (2016)<br>Zecchin et al. (2004) |
| Estuary deposit            | An estuary is a semi-enclosed costal body of water that extends to the effective limit of tidal influence, within which sea water entering from one or more free connections with the open sea, or any other saline coastal body of water, is significantly diluted with fresh water derived from land drainage, and can sustain euryhaline biological species from either part or the whole of their life cycle. | < highest astronomical tide (HAT)              | The upper limit of estuary deposits is the highest astronomical tide, but the lower limit is bounded bathymetry. As a result, an estuary deposit can only be used as a marine limiting indicator, with an uncertainty range that is HAT-MSL. | Perillo (1995)                                |



**Table 3.** Summary of reviewed inferred MIS 5 sea level data. For references refer to the text.

| Site name                     | Latitude | Longitude | Indicator Type <sup>1</sup> | RSL/ elevation (m) | Dating methods | RSL Quality <sup>2</sup> | Age Quality <sup>2</sup> |
|-------------------------------|----------|-----------|-----------------------------|--------------------|----------------|--------------------------|--------------------------|
| Southeast Entre Rios Province | -33.060  | -58.440   | ML                          | 6.2±1.6            | 14C            | 1                        | 0                        |
| Puerto de Nueva Palmira       | -33.880  | -58.419   | ML                          | 12.5±2.8           | OSL, 14C       | 1                        | 2                        |
| La Coronilla                  | -33.900  | -53.509   | ML                          | 0.5±0.5            | 14C            | 1                        | 0                        |
| Zagarzazu                     | -33.966  | -58.335   | ML                          | 0.5±0.5            | OSL, 14C       | 1                        | 2                        |
| Martin Garcia Island          | -34.180  | -58.250   | ML                          | 7.5±1.7            | 14C            | 1                        | 0                        |
| Pilar                         | -34.456  | -58.968   | ML                          | 8.0±1.8            | 14C            | 1                        | 0                        |
| Ezeiza                        | -34.764  | -58.550   | ML                          | 3.5±0.8            | OSL, 14C       | 1                        | 0                        |
| Hudson                        | -34.786  | -58.149   | ML                          | 6.0±1.9            | OSL            | 1                        | 2                        |
| Nicolas Vignogna III Quarry   | -34.913  | -58.705   | TL                          | 1.3±3.1            | OSL, 14C       | 1                        | 0                        |
| Magdalena                     | -35.062  | -57.586   | ML                          | 6.0±1.7            | AAR, 14C       | 1                        | 3                        |
| Puente de Pascua              | -35.927  | -57.720   | ML                          | 3.5±1.3            | AAR            | 1                        | 3                        |
| Puente de Pascua              | -35.927  | -57.719   | SLI                         | 6.8±4.0            | AAR            | 2                        | 3                        |
| Mar del Plata                 | -38.040  | -57.540   | SLI                         | 10.3±2.5           | 14C            | 1                        | 0                        |
| Bahia Blanca                  | -38.680  | -62.470   | ML                          | 13.1±3.7           | 14C            | 1                        | 0                        |
| Claromeco                     | -38.856  | -60.021   | SLI                         | 7.0±2.0            | U/Th           | 1                        | 3                        |
| Colorado River Delta          | -39.690  | -62.090   | SLI                         | 4.8±1.8            | 14C            | 1                        | 0                        |
| San Blas                      | -40.614  | -62.278   | SLI                         | 5.8±3.8            | 14C            | 1                        | 0                        |
| San Blas                      | -40.671  | -62.482   | SLI                         | 12.4±3.1           | AAR            | 1                        | 1                        |
| San Antonio Oeste             | -40.703  | -65.000   | SLI                         | 6.3±2.8            | ESR, U/Th      | 2                        | 3                        |
| San Antonio Oeste             | -40.772  | -65.036   | SLI                         | 8.7±3.9            | AAR, ESR, U/Th | 2                        | 3                        |
| San Antonio Oeste             | -40.792  | -64.861   | SLI                         | 9.7±8.6            | AAR            | 1                        | 1                        |
| San Blas                      | -40.793  | -62.283   | SLI                         | 4.0±3.9            | AAR, ESR       | 2                        | 2                        |
| San Antonio Oeste             | -40.817  | -64.782   | SLI                         | 9.0±5.5            | AAR, ESR       | 2                        | 3                        |
| Puerto Lobos                  | -42.008  | -65.084   | SLI                         | 8.8±2.9            | 14C            | 1                        | 0                        |
| Puerto Lobos                  | -42.008  | -65.084   | SLI                         | 6.8±2.7            | 14C            | 1                        | 0                        |
| Caleta Valdes                 | -42.313  | -63.694   | SLI                         | 16.6±4.2           | ESR, U/Th      | 2                        | 3                        |
| Caleta Valdes                 | -42.334  | -63.672   | SLI                         | 15.6±4.0           | U/Th           | 2                        | 3                        |
| Caleta Valdes                 | -42.350  | -63.650   | SLI                         | 19.1±7.5           | 14C            | 1                        | 0                        |
| Caleta Valdes                 | -42.395  | -63.644   | SLI                         | 20.7±4.4           | AAR, ESR       | 1                        | 3                        |
| Caleta Valdez                 | -42.484  | -63.611   | SLI                         | 9.2±3.3            | AAR, ESR, U/Th | 1                        | 1                        |
| Camarones                     | -44.681  | -65.668   | SLI                         | 4.8±5.6            | U/Th           | 1                        | 3                        |
| Camarones                     | -44.683  | -65.679   | SLI                         | 4.8±1.5            | U/Th           | 1                        | 3                        |
| Camarones                     | -44.693  | -65.674   | SLI                         | 6.5±5.8            | ESR, U/Th      | 1                        | 3                        |
| Camarones                     | -44.716  | -65.693   | SLI                         | 12.8±3.3           | ESR            | 1                        | 3                        |
| Camarones                     | -44.750  | -65.720   | SLI                         | 19.1±5.4           | 14C            | 0                        | 0                        |
| Camarones                     | -44.806  | -65.734   | SLI                         | 7.8±1.5            | U/Th           | 1                        | 3                        |
| Camarones                     | -44.820  | -65.740   | SLI                         | 17.8±6.0           | 14C            | 0                        | 0                        |
| Camarones                     | -44.890  | -65.670   | SLI                         | 15.8±4.0           | ESR, U/Th      | 0                        | 3                        |



**Table 3.** Continued

| Site name                     | Latitude | Longitude | Indicator Type | RSL/<br>elevation (m) | Dating methods | RSL Quality <sup>1</sup> | Age Quality <sup>1</sup> |
|-------------------------------|----------|-----------|----------------|-----------------------|----------------|--------------------------|--------------------------|
| Bahia Bustamante              | -45.087  | -66.510   | SLI            | 8.4±2.3               | ESR            | 1                        | 3                        |
| Bahia Bustamante              | -45.090  | -66.531   | SLI            | 12.8±5.6              | AAR, ESR, U/Th | 1                        | 2                        |
| Bahia Bustamante              | -45.090  | -66.531   | SLI            | 9.5±4.9               | AAR, ESR, U/Th | 1                        | 2                        |
| Bahia Bustamante              | -45.112  | -66.552   | SLI            | 14.2±3.7              | ESR            | 1                        | 2                        |
| Bahia Bustamante              | -45.113  | -66.546   | SLI            | 5.9±2.3               | ESR            | 3                        | 2                        |
| Bahia Bustamante              | -45.133  | -66.589   | SLI            | 14.2±3.7              | ESR            | 1                        | 3                        |
| Bahia Bustamante              | -45.137  | -66.579   | SLI            | 8.3±2.8               | AAR, ESR, U/Th | 3                        | 3                        |
| Caleta Olivia                 | -46.340  | -67.461   | SLI            | 15.5±4.0              | U/Th           | 2                        | 3                        |
| Caleta Olivia                 | -46.519  | -67.461   | SLI            | 15.5±4.0              | ESR, U/Th      | 2                        | 3                        |
| Caleta Olivia                 | -46.558  | -67.434   | SLI            | 10.8±8.9              | AAR, ESR       | 1                        | 3                        |
| Caleta Olivia                 | -46.564  | -67.428   | SLI            | 14.0±8.4              | AAR, ESR       | 1                        | 3                        |
| Caleta Olivia                 | -46.622  | -67.351   | SLI            | 12.3±4.0              | 14C            | 1                        | 0                        |
| Mazarredo                     | -47.035  | -66.679   | SLI            | 12.2±3.4              | AAR, ESR, U/Th | 1                        | 3                        |
| Mazarredo                     | -47.080  | -65.947   | SLI            | 15.9±4.0              | U/Th           | 0                        | 3                        |
| Puerto Deseado                | -47.754  | -65.913   | SLI            | 22.2±7.1              | AAR, ESR       | 1                        | 1                        |
| San Julian                    | -49.310  | -67.720   | SLI            | 7.6±3.4               | ESR            | 1                        | 3                        |
| San Julian                    | -49.316  | -67.776   | SLI            | 15.1±4.2              | ESR, U/Th      | 2                        | 3                        |
| San Julian                    | -49.327  | -67.809   | SLI            | 6.7±3.7               | ESR            | 2                        | 3                        |
| San Julian                    | -49.327  | -67.809   | SLI            | 5.1±2.9               | ESR            | 2                        | 3                        |
| Northeastern Tierra del Fuego | -53.431  | -68.180   | SLI            | 17.5±5.6              | 14C            | 1                        | 0                        |
| Northeastern Tierra del Fuego | -53.502  | -68.094   | SLI            | 13.4±3.7              | AAR, U/Th      | 1                        | 3                        |
| Puerto Williams               | -54.936  | -67.466   | SLI            | 11.1±2.1              | 14C            | 3                        | 0                        |

<sup>1</sup> SLI - sea level indicator; ML - marine limiting; TL - terrestrial limiting <sup>2</sup> Quality ranges from 5 (excellent) to 0 (rejected). See the documentation in the WALIS for more information



**Table 4.** Measurement techniques used to establish the elevation of MIS 5 shorelines in Argentina.

| Measurement technique                        | Description                                                                                                                                                                                                                          | Typical accuracy                                                                              |
|----------------------------------------------|--------------------------------------------------------------------------------------------------------------------------------------------------------------------------------------------------------------------------------------|-----------------------------------------------------------------------------------------------|
| Not reported                                 | The elevation measurement technique was not reported, most probably hand level or metered tape.                                                                                                                                      | 20% of the original elevation reported added in root mean square to the sea level datum error |
| Barometric altimeter                         | Difference in barometric pressure between a point of known elevation (often sea level) and a point of unknown elevation. Not accurate and used only rarely                                                                           | Up to $\pm 20\%$ of elevation measurement                                                     |
| Topographic map and digital elevation models | Elevation derived from the contour lines on topographic maps. Most often used for large-scale landforms (i.e. marine terraces). Several meters of error are possible, depending on the scale of the map or the resolution of the DEM | Variable with scale of map and technique used to derive DEM.                                  |





**Table 5.** Species of shells that have been dated in southeastern South America. Names are as reported in the original papers.

| Species                        | Dating Method    | Locations                                                            |
|--------------------------------|------------------|----------------------------------------------------------------------|
| <i>A. brasiliana</i>           | Radiocarbon      | Puerto de Nueva Palmira                                              |
| <i>Adelomelon ancilla</i>      | AAR              | Caleta Valdes, San Antonio Oeste                                     |
| <i>Amiantis purpurata</i>      | AAR, ESR         | Caleta Olivia, San Antonio Oeste                                     |
| <i>Aulacomya magellanica</i>   | AAR              | Puerto Deseado, San Antonio Oeste                                    |
| <i>Brachidontes rodriguezi</i> | AAR              | Caleta Valdes, Puerto Deseado                                        |
| <i>Buccinanops Sp</i>          | AAR, Radiocarbon | San Blas, Bahia Blanca                                               |
| <i>Chione antiqua</i>          | Radiocarbon      | Camarones                                                            |
| <i>Chione subrostrata</i>      | Radiocarbon      | Ezeiza                                                               |
| <i>Chlamys patriae</i>         | AAR              | San Antonio Oeste                                                    |
| <i>Choromytilus Sp.</i>        | ESR              | San Blas                                                             |
| <i>Crepidula dilatata</i>      | AAR              | San Antonio Oeste                                                    |
| <i>Erodona mactroides</i>      | Radiocarbon      | Southeast Entre Rios Province, Martin Garcia Island                  |
| <i>Glycymeris longior</i>      | AAR, Radiocarbon | San Antonio Oeste, Mar del Plata, Colorado River Delta               |
| <i>Glycymeris Sp.</i>          | AAR, U/Th        | Bahia Bustamante                                                     |
| <i>Macrocallista boliv.</i>    | ESR, U/Th        | San Antonio Oeste                                                    |
| <i>Macrocallista sp.</i>       | ESR, U/Th        | San Antonio Oeste                                                    |
| <i>Macra sp.</i>               | AAR              | Puente de Pascua                                                     |
| <i>Macra isabelleana</i>       | Radiocarbon      | Puerto de Nueva Palmira, La Coronilla                                |
| <i>Mercenaria sp.</i>          | ESR, U/Th        | Camarones, Caleta Olivia, Camarones                                  |
| <i>Mytilus edulis</i>          | AAR              | Caleta Valdes, San Antonio Oeste, San Blas                           |
| <i>Mytilus sp.</i>             | ESR              | Caleta Valdes, Mazarredo, San Julian                                 |
| <i>Ostrea sp.</i>              | Radiocarbon      | Magdalena, Nicolás Vignona III Quarry                                |
| <i>Ostrea equestris</i>        | Radiocarbon      | La Coronilla                                                         |
| <i>Patinigera magellanica</i>  | AAR              | Puerto Deseado                                                       |
| <i>Pelecypoda indet.</i>       | ESR              | Caleta Valdes                                                        |
| <i>Perumytilus purpur</i>      | ESR              | Puerto Deseado                                                       |
| <i>Pitar rostrata</i>          | AAR, ESR         | Bahia San Sebastian, Caleta Valdez, San Antonio Oeste, San Blas      |
| <i>Pitar sp.</i>               | ESR, U/Th        | Caleta Valdes, Camarones, San Blas                                   |
| <i>Protothaca ant.</i>         | AAR, ESR, U/Th   | Bahia Bustamante, Caleta Olivia, Camarones, Mazarredo, Caleta Valdes |
| <i>Protothaca sp.</i>          | AAR, ESR, U/Th   | Bahia Bustamante, Caleta Olivia, Camarones, Mazarredo, San Julian    |
| <i>Samarangia exalbida</i>     | AAR              | San Antonio Oeste                                                    |
| <i>Tagelus gibbus</i>          | Radiocarbon      | Southeast Entre Rios Province                                        |
| <i>Tagelus sp.</i>             | AAR              | Magdalena                                                            |
| <i>Tagelus plebeius</i>        | Radiocarbon      | Zagarazu                                                             |
| <i>Thais haemastroma</i>       | Radiocarbon      | Martin Garcia Island                                                 |
| <i>T. plebeius</i>             | Radiocarbon      | Pilar                                                                |
| <i>Voluta sp.</i>              | ESR, U/Th        | San Antonio Oeste                                                    |
| <i>Zidona angulata</i>         | Radiocarbon      | Colorado River Delta                                                 |
| <i>Zidona dufresnei</i>        | AAR              | Caleta Valdes, San Blas                                              |
